# Supplementary material for: Exploring the antimicrobial properties of synthetic tetrahydro-2 H -1,3,5-thiadiazine-2-thiones (THTTs) through in vitro and in silico antileishmanial and antibacterial studies
Source: Royal Society of Chemistry journal article supplement (doi:10.1039/d5ra05994a), 2025-01-01

## Supporting information

### Exploring the Antimicrobial Properties of Synthetic Tetrahydro-2*H*-1,3,5-Thiadiazine-2-thiones (THTTs) through In-vitro and In-silico Antileishmanial and Antibacterial Studies

Rasool Khan<sup>a\*,†</sup>, Sumaya Raheem<sup>a†</sup>, Sobia Ahsan Halim<sup>b</sup>, Midrar Ullah<sup>c</sup>, Haleema Ali<sup>a</sup>, Imdad Ullah Khan<sup>d</sup>, Momin Khan<sup>d</sup>, Hanan A. Ogaly<sup>d</sup>, Mohammad Zubair<sup>e</sup>, Mesaik M. Ahmed<sup>e</sup>, Ajmal Khan<sup>b,f\*</sup>, Ahmed Al-Harrasi<sup>b\*</sup>

<sup>a</sup>Institute of Chemical Sciences, University of Peshawar, Peshawar 25120, Pakistan

<sup>b</sup>Natural and Medical Sciences Research Center, University of Nizwa, PO Box 33, 616 Birkat Al Mauz, Nizwa, Oman

<sup>c</sup>Institute of Bacha Khan Medical College, Khyber Medical University, Peshawar, Pakistan

<sup>d</sup>Chemistry Department, College of Science, King Khalid University, Abha 61421, Saudi Arabia

<sup>e</sup>Department of Medical Microbiology, Faculty of Medicine, University of Tabuk, Tabuk 71491, Saudi Arabia

<sup>f</sup>Department of Chemical and Biological Engineering, College of Engineering, Korea University, Seoul 02841, Republic of Korea

† These authors contributed equally to this work and are first co-authors

**\* Corresponding author**

**Rasool Khan**

Institute of Chemical Sciences, University of Peshawar, Peshawar 25120, Pakistan. e-mail: [rasoolkhan@uop.edu.pk](mailto:rasoolkhan@uop.edu.pk),

**Ajmal Khan:**

Natural and Medical Sciences Research Center, University of Nizwa, Birkat-ul-Mouz 616, Nizwa, Sultanate of Oman. e-mail: [ajmalkhan@unizwa.edu.om](mailto:ajmalkhan@unizwa.edu.om), Tel. [+96825446502](tel:+96825446502).

**Ahmed Al-Harrasi:**

Natural and Medical Sciences Research Center, University of Nizwa, Birkat-ul-Mouz 616, Nizwa, Sultanate of Oman. e-mail: [aharrasi@unizwa.edu.om](mailto:aharrasi@unizwa.edu.om), Tel. [+96825446328](tel:+96825446328).

2-(5-methyl-6-thioxo-1,3,5-thiadiazinan-3-yl) butanoic acid (4a)

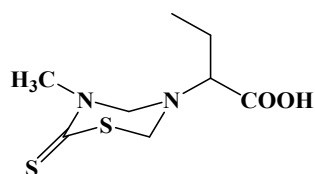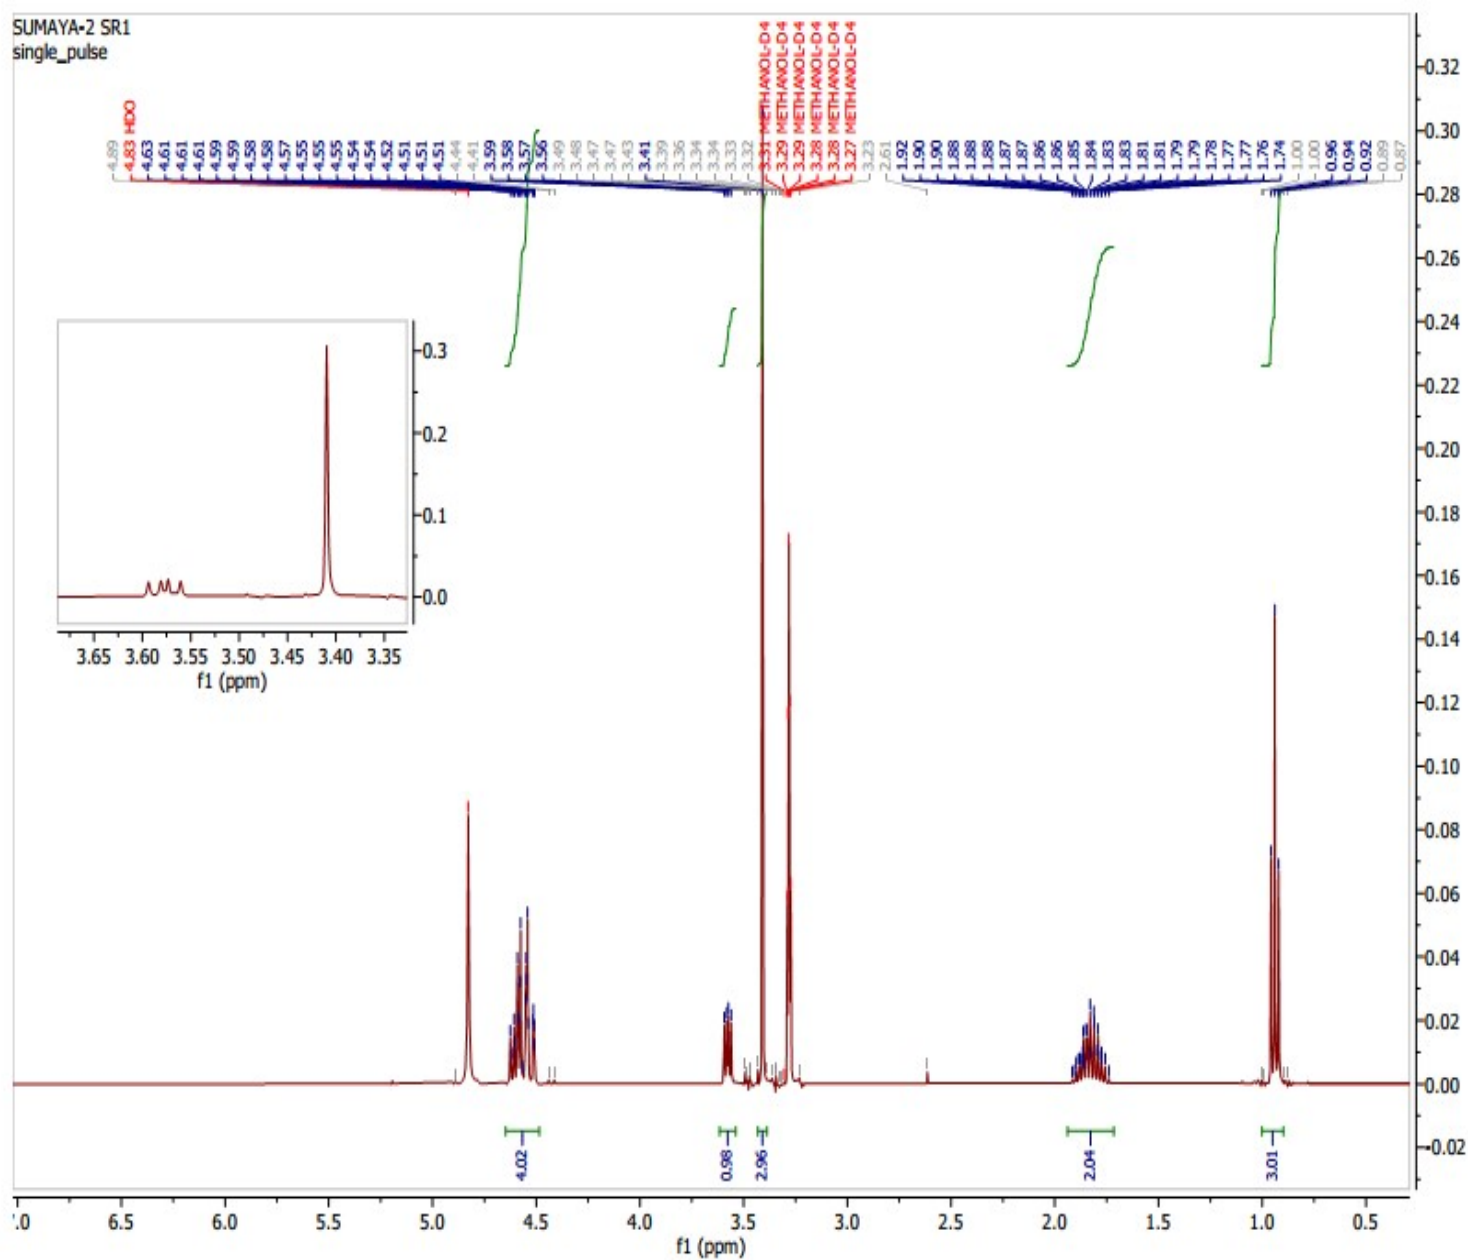

20200219 SUMAYA-6 SR1.1.1.1r  
Bruker AVANCEIII 400 20200219  
C13 MeOD D:\DATA-2020\33

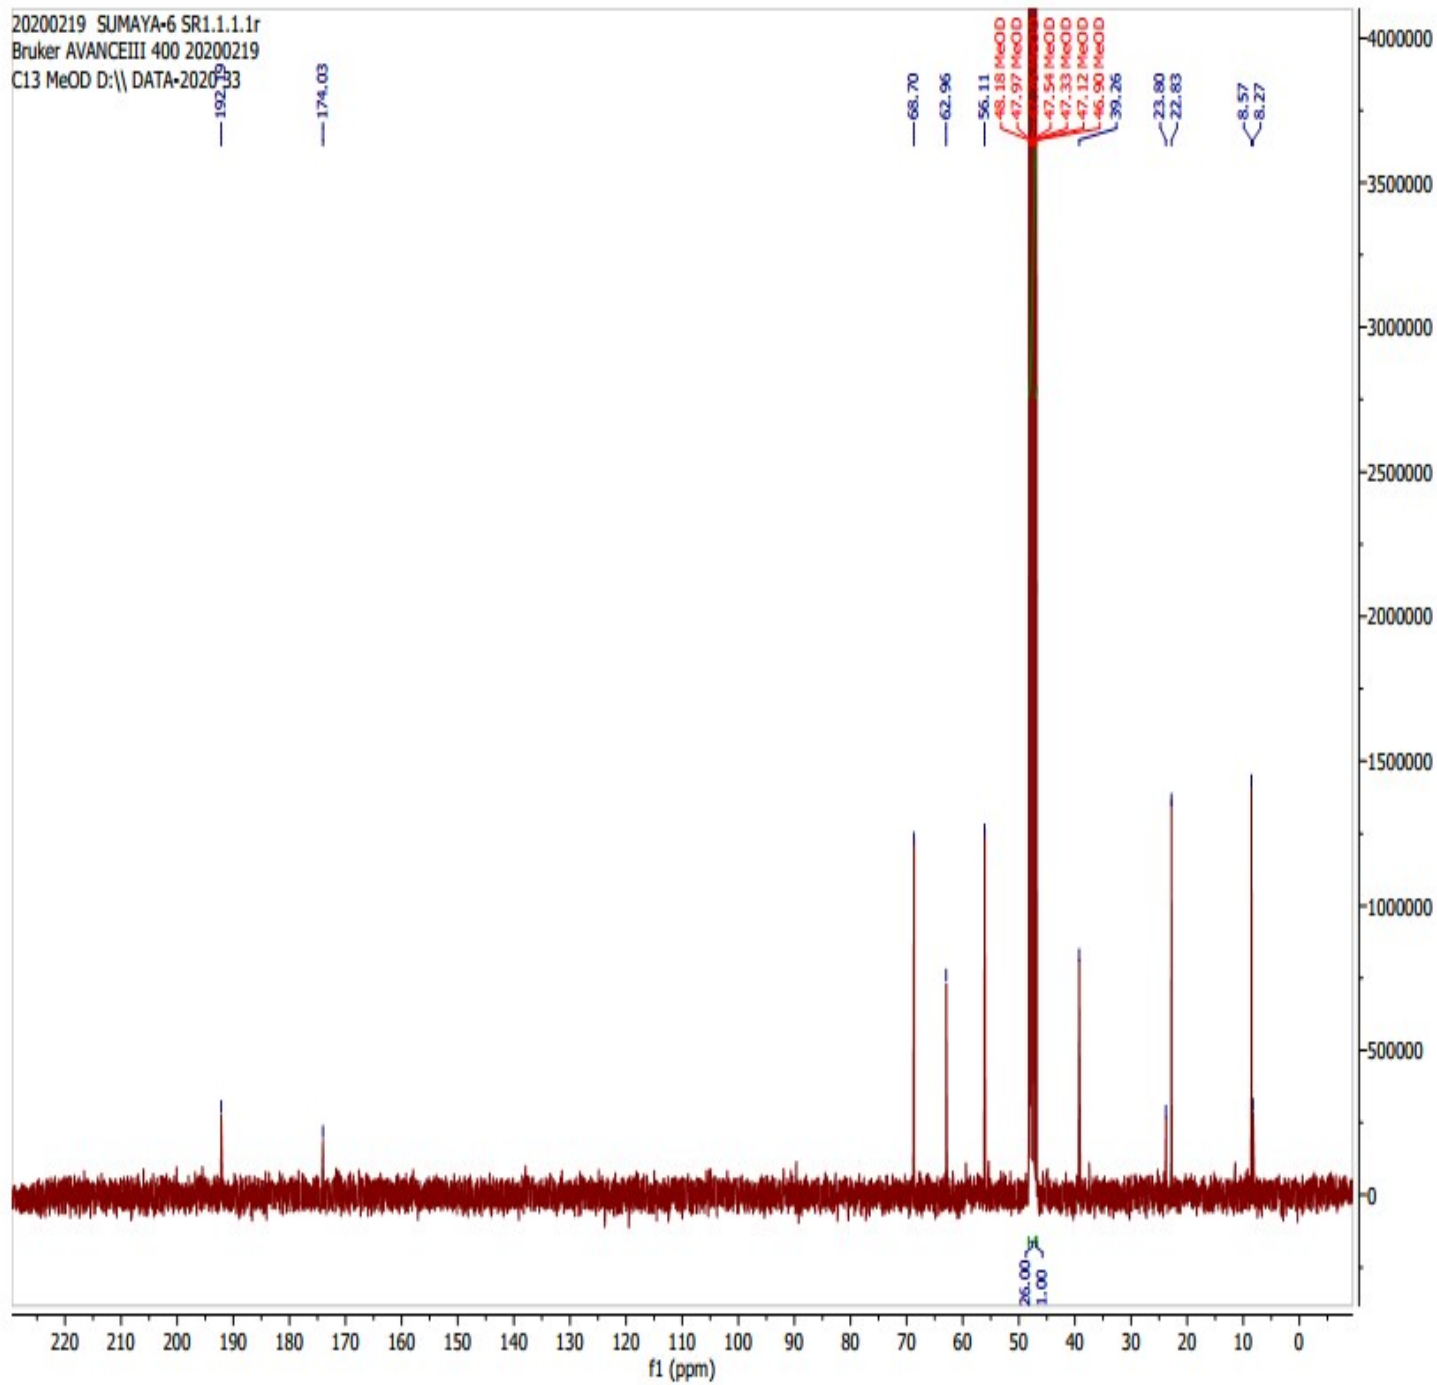

2-(5-ethyl-6-thioxo-1,3,5-thiadiazinan-3-yl)butanoic acid (4b)

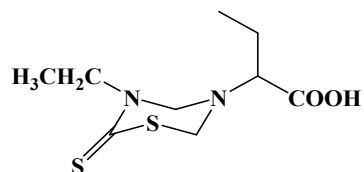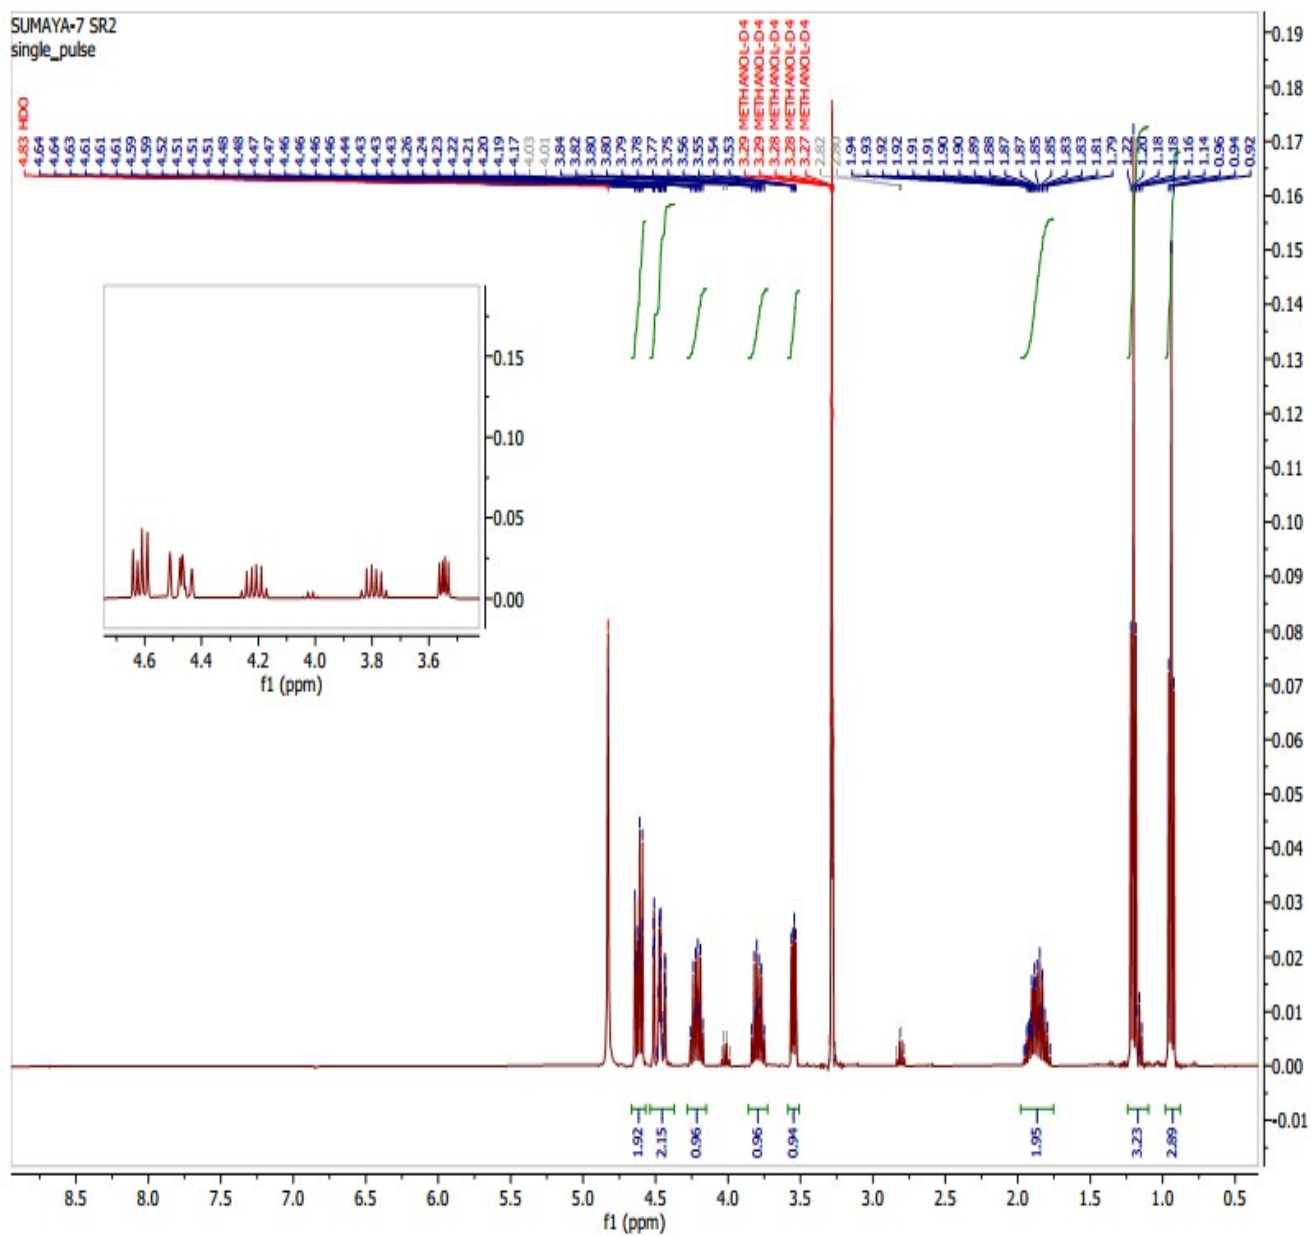

20200219 SUMAYA-7 SR2.1.1.1r  
Bruker AVANCEIII 400 20200219  
C13 MeOD D:\\ DATA-2020\\30

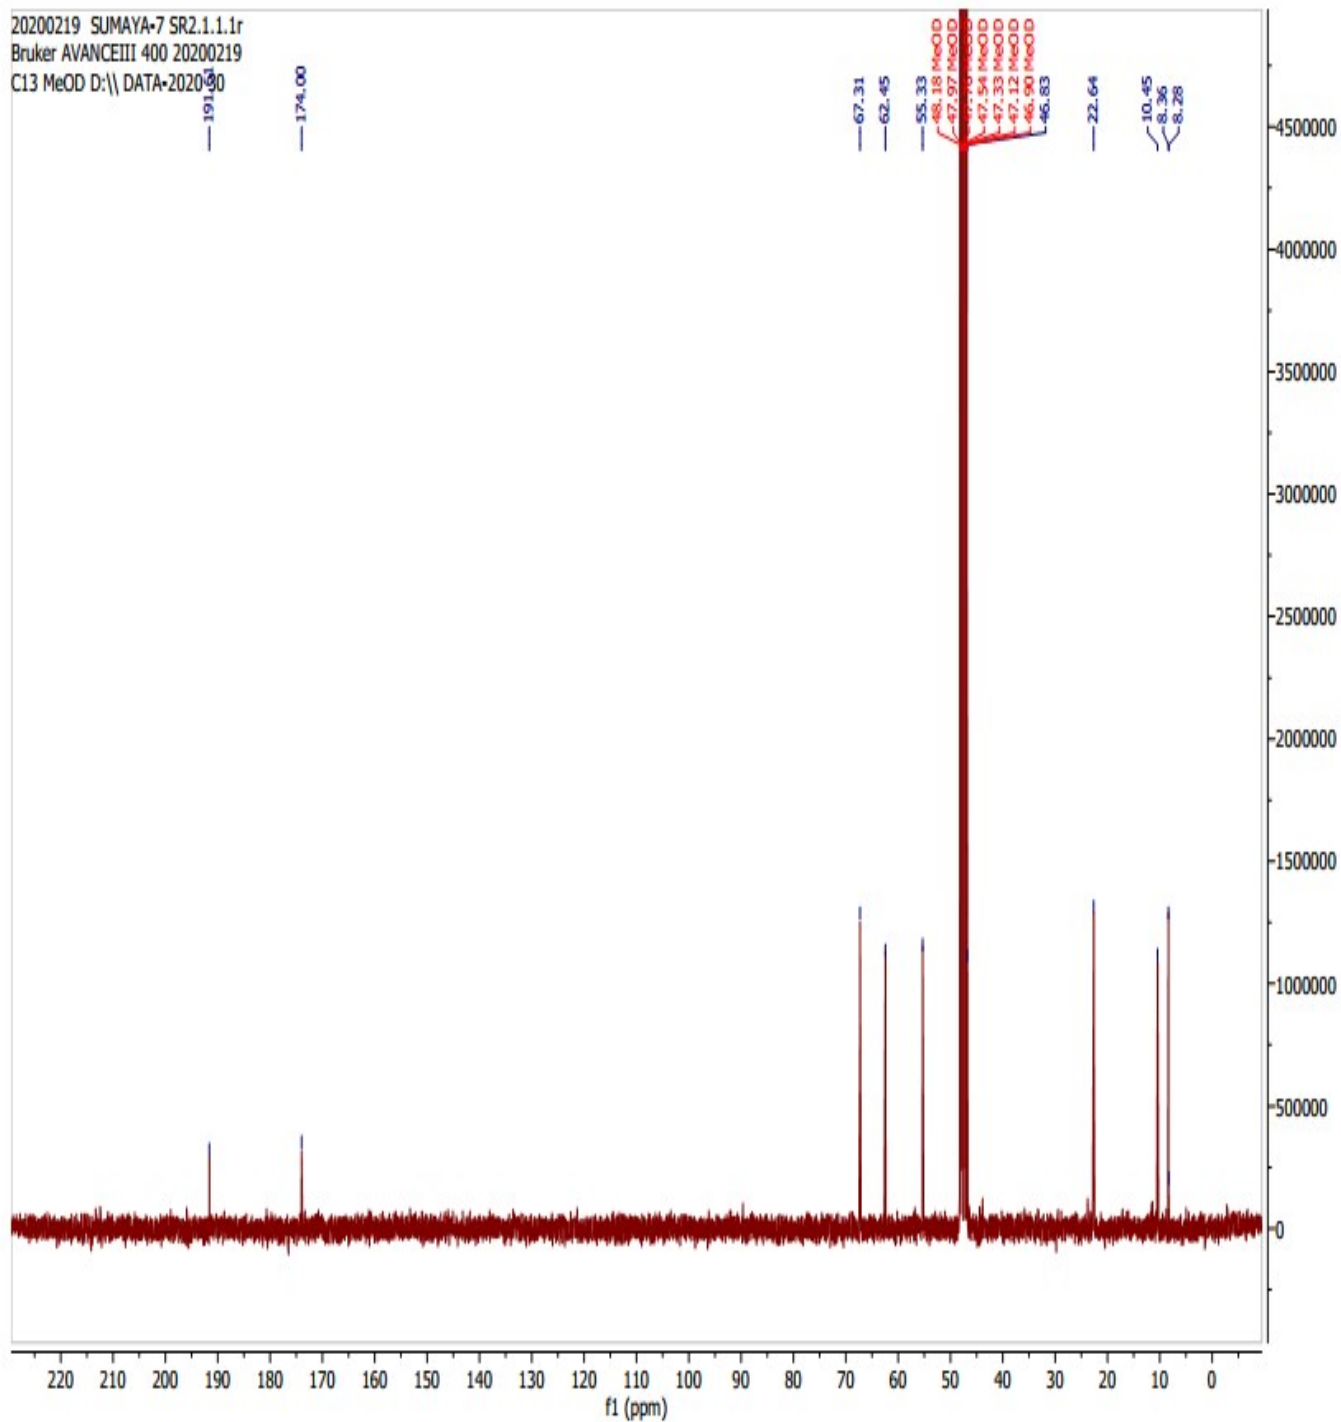

2-(5-propyl-6-thioxo-1,3,5-thiadiazinan-3-yl)butanoic acid (4c)

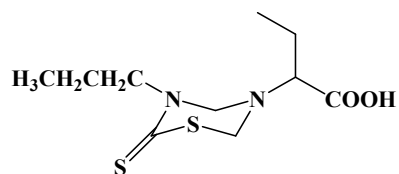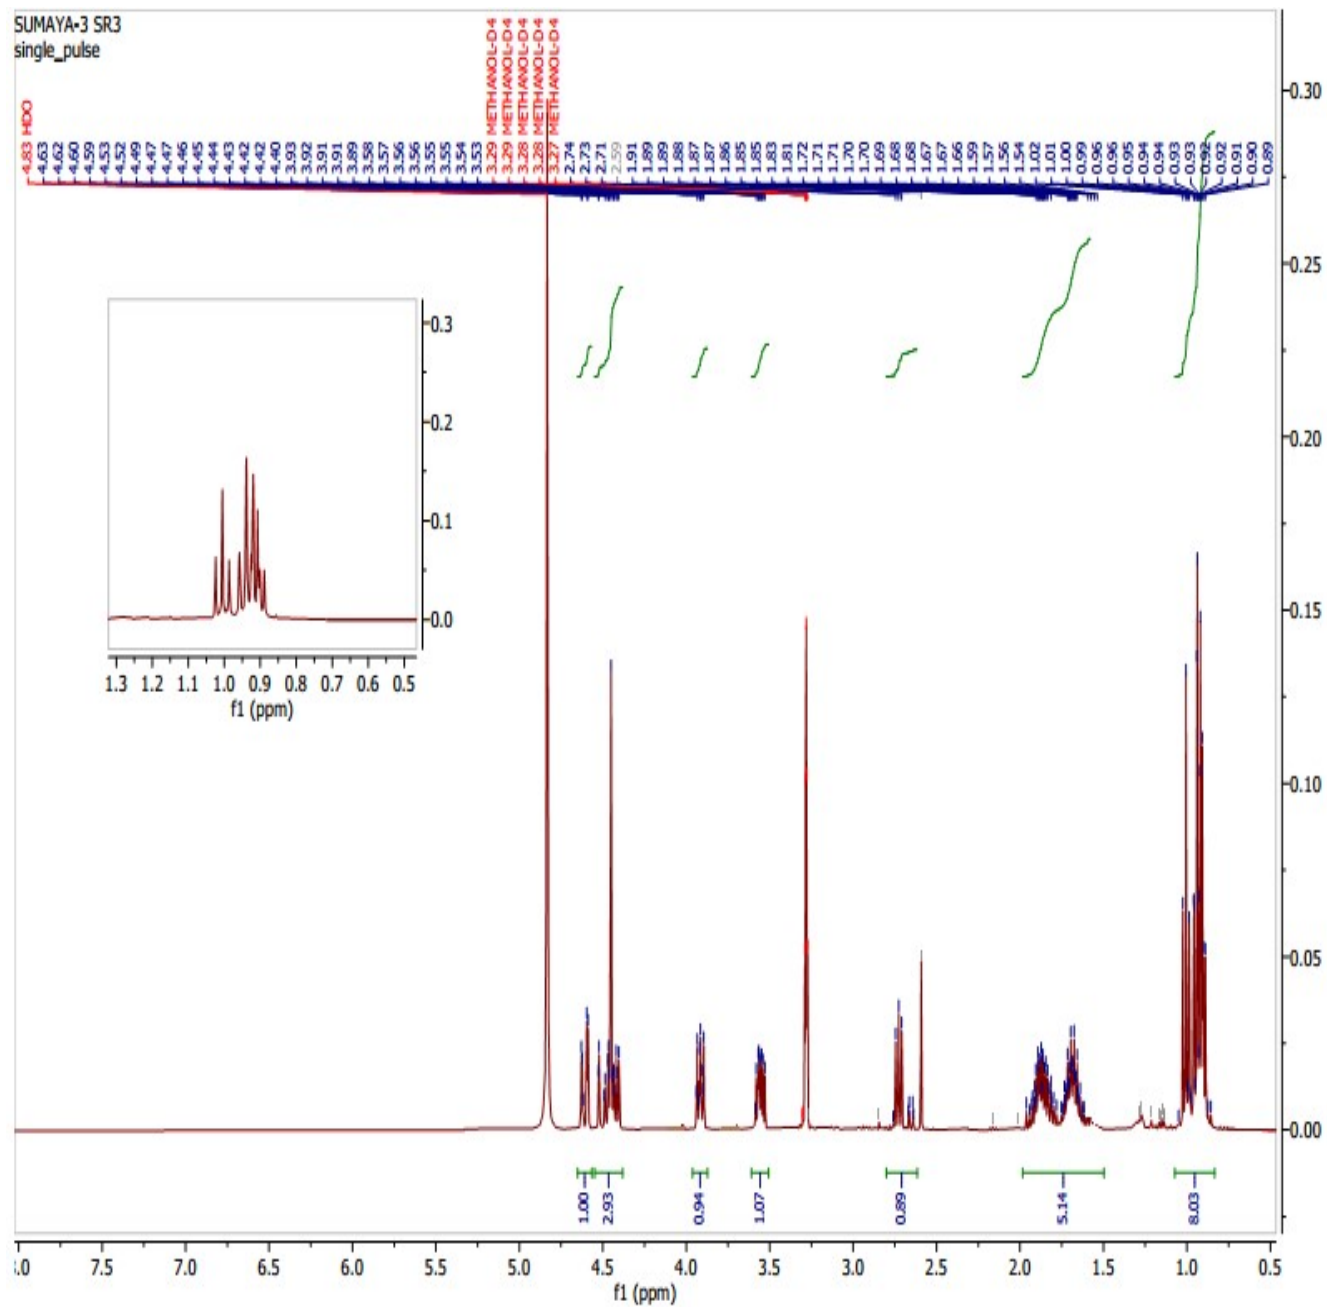

2-(5-octyl-6-thioxo-1,3,5-thiadiazinan-3-yl)butanoic acid (4d)

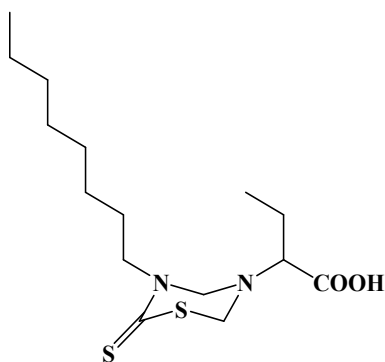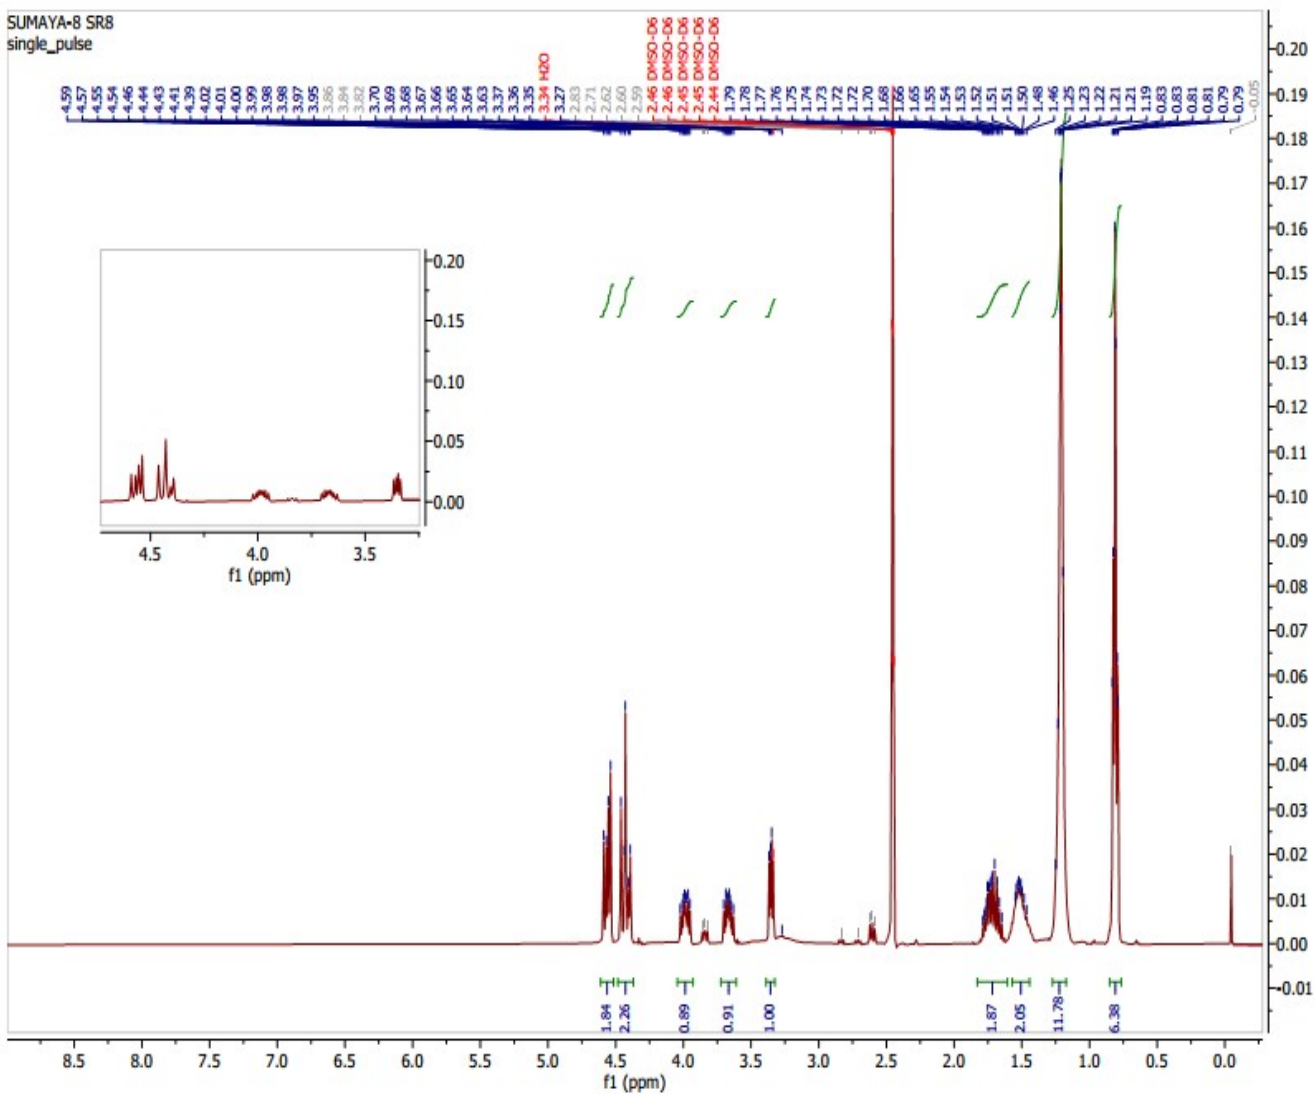

2-(5-dodecyl-6-thioxo-1,3,5-thiadiazinan-3-yl)butanoic acid (4e)

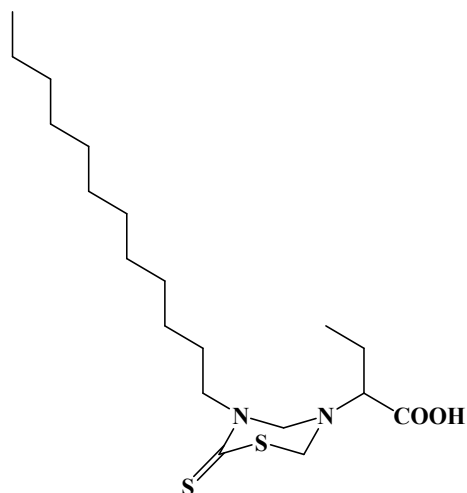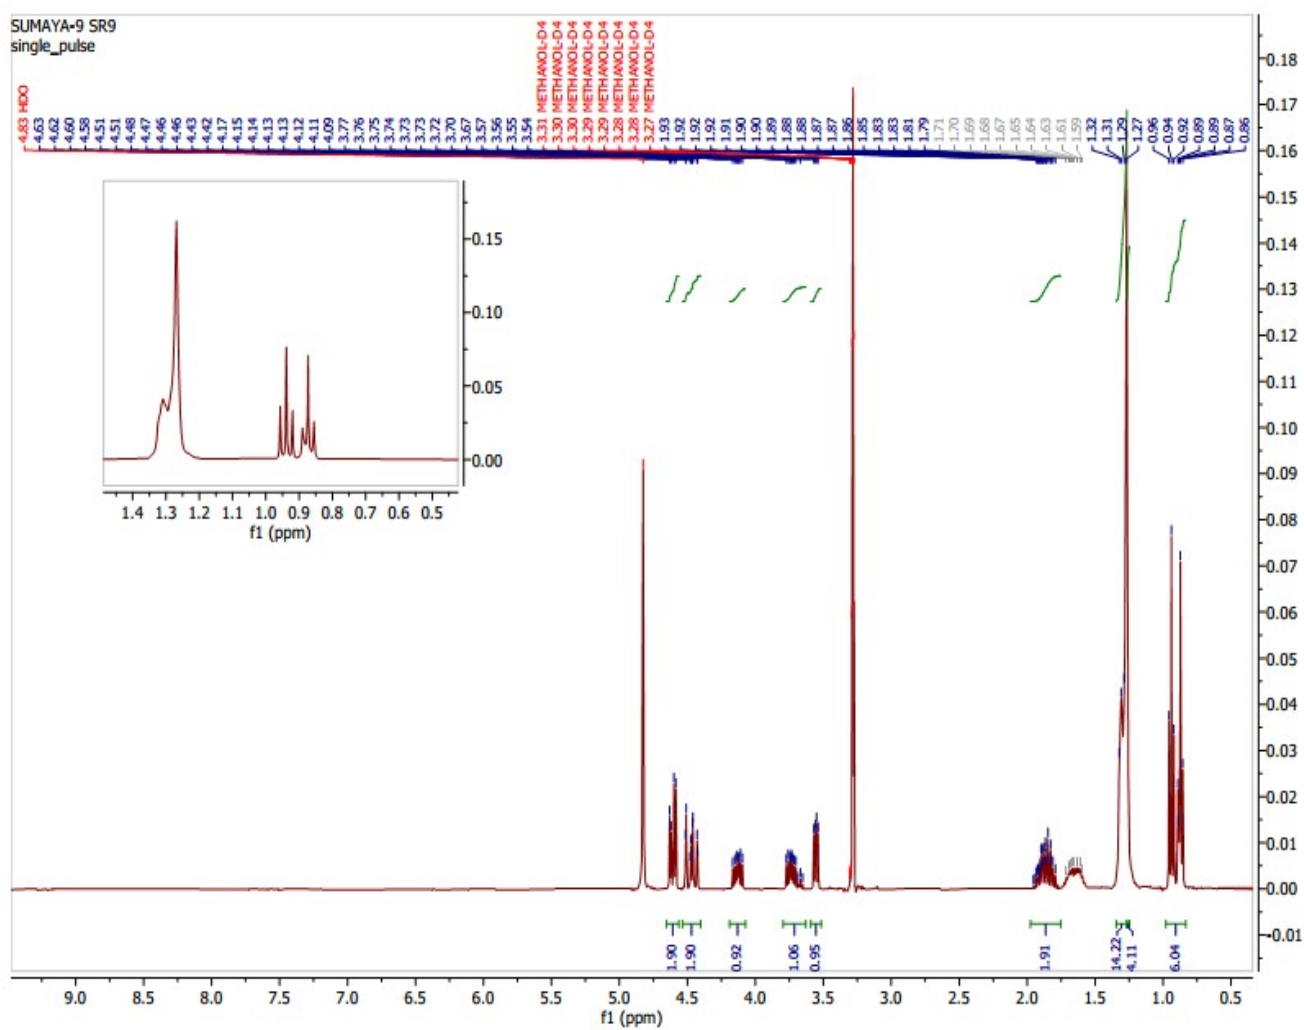



20200219 SUMAYA-9 SR9.1.1.1r  
Bruker AVANCEIII 400 20200219  
C13 MeOD D:\\ DATA-2020\\01

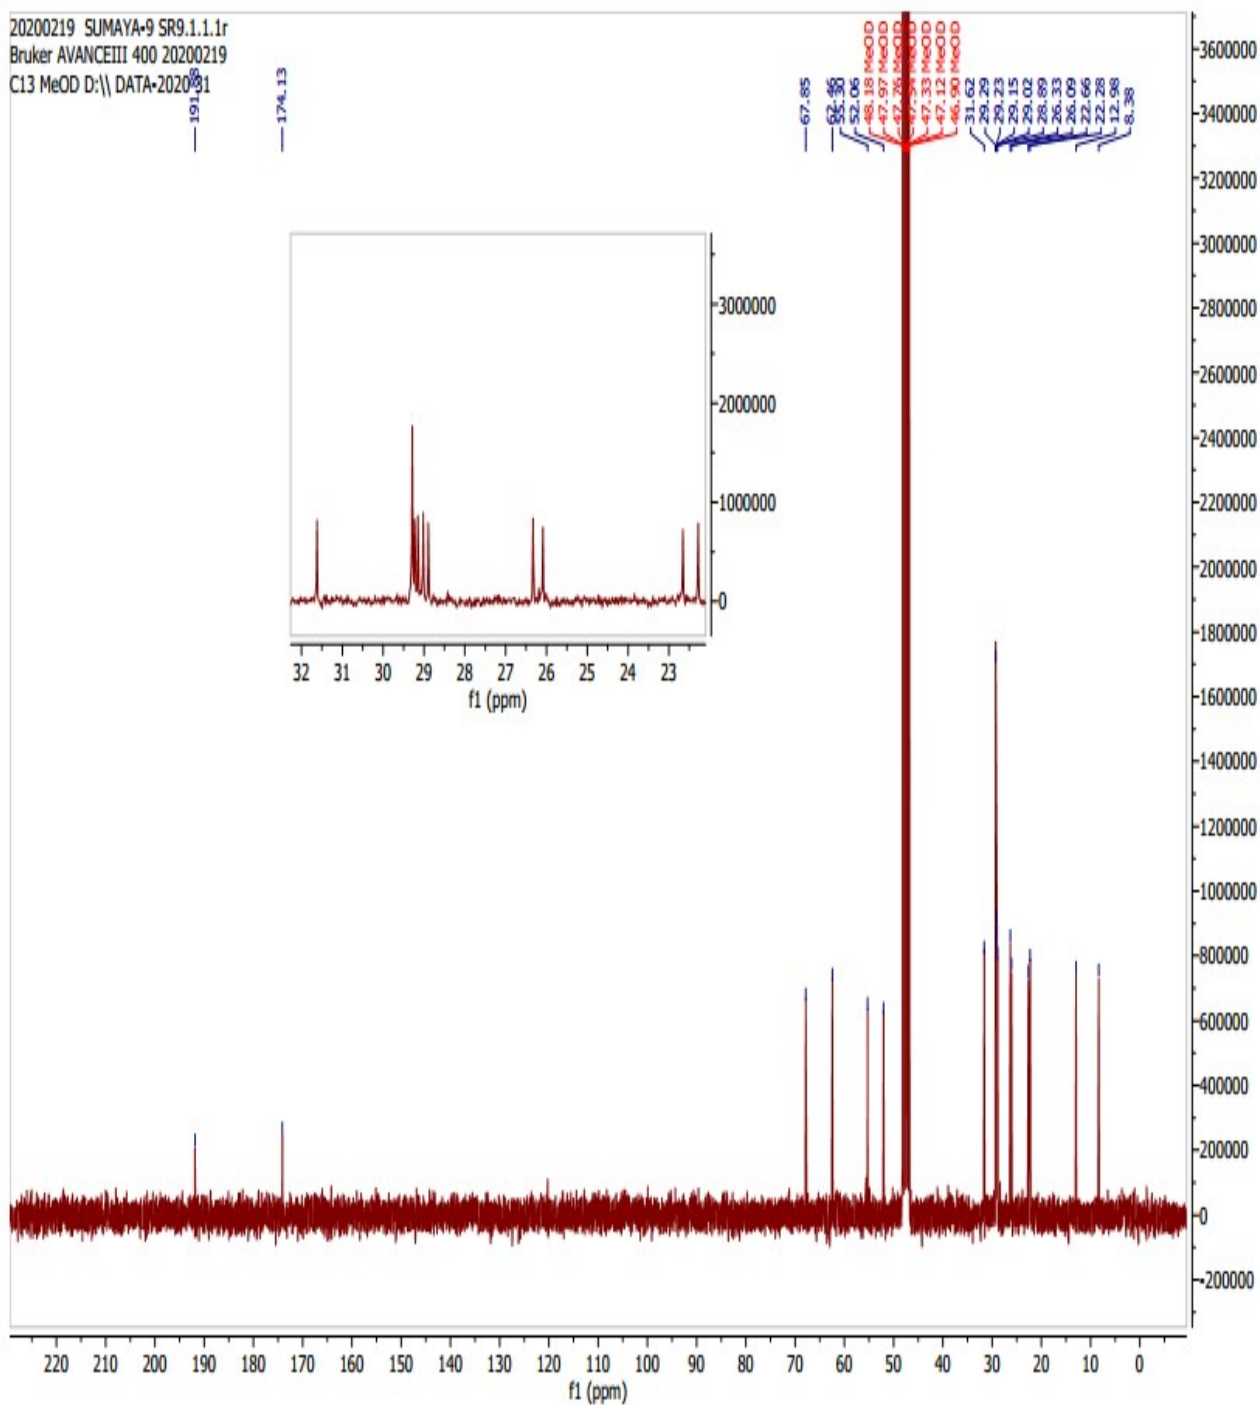

2-(5-benzyl -6-thioxo-1,3,5-thiadiazinan-3-yl)butanoic acid (4f)

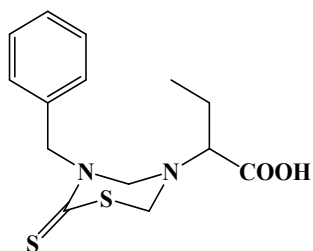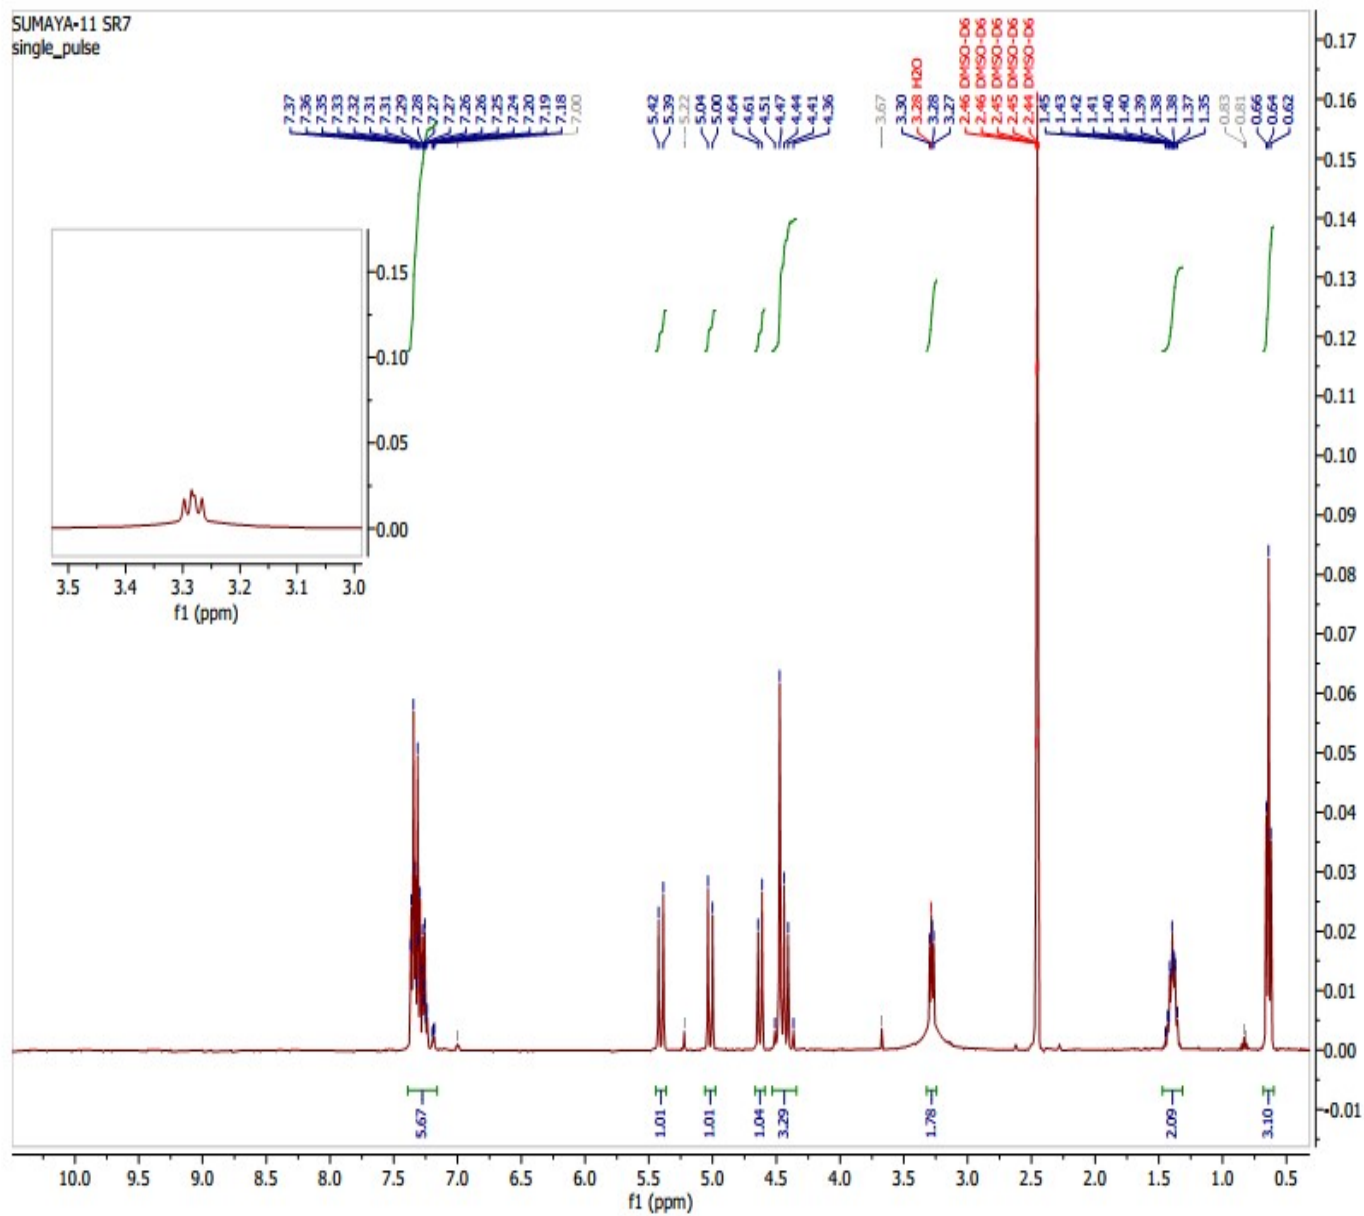

20200219 SUMAYA-11 SR7.1.1.1r  
Bruker AVANCEIII 400 20200219  
C13 DMSO D:\DATA-2020\20200219

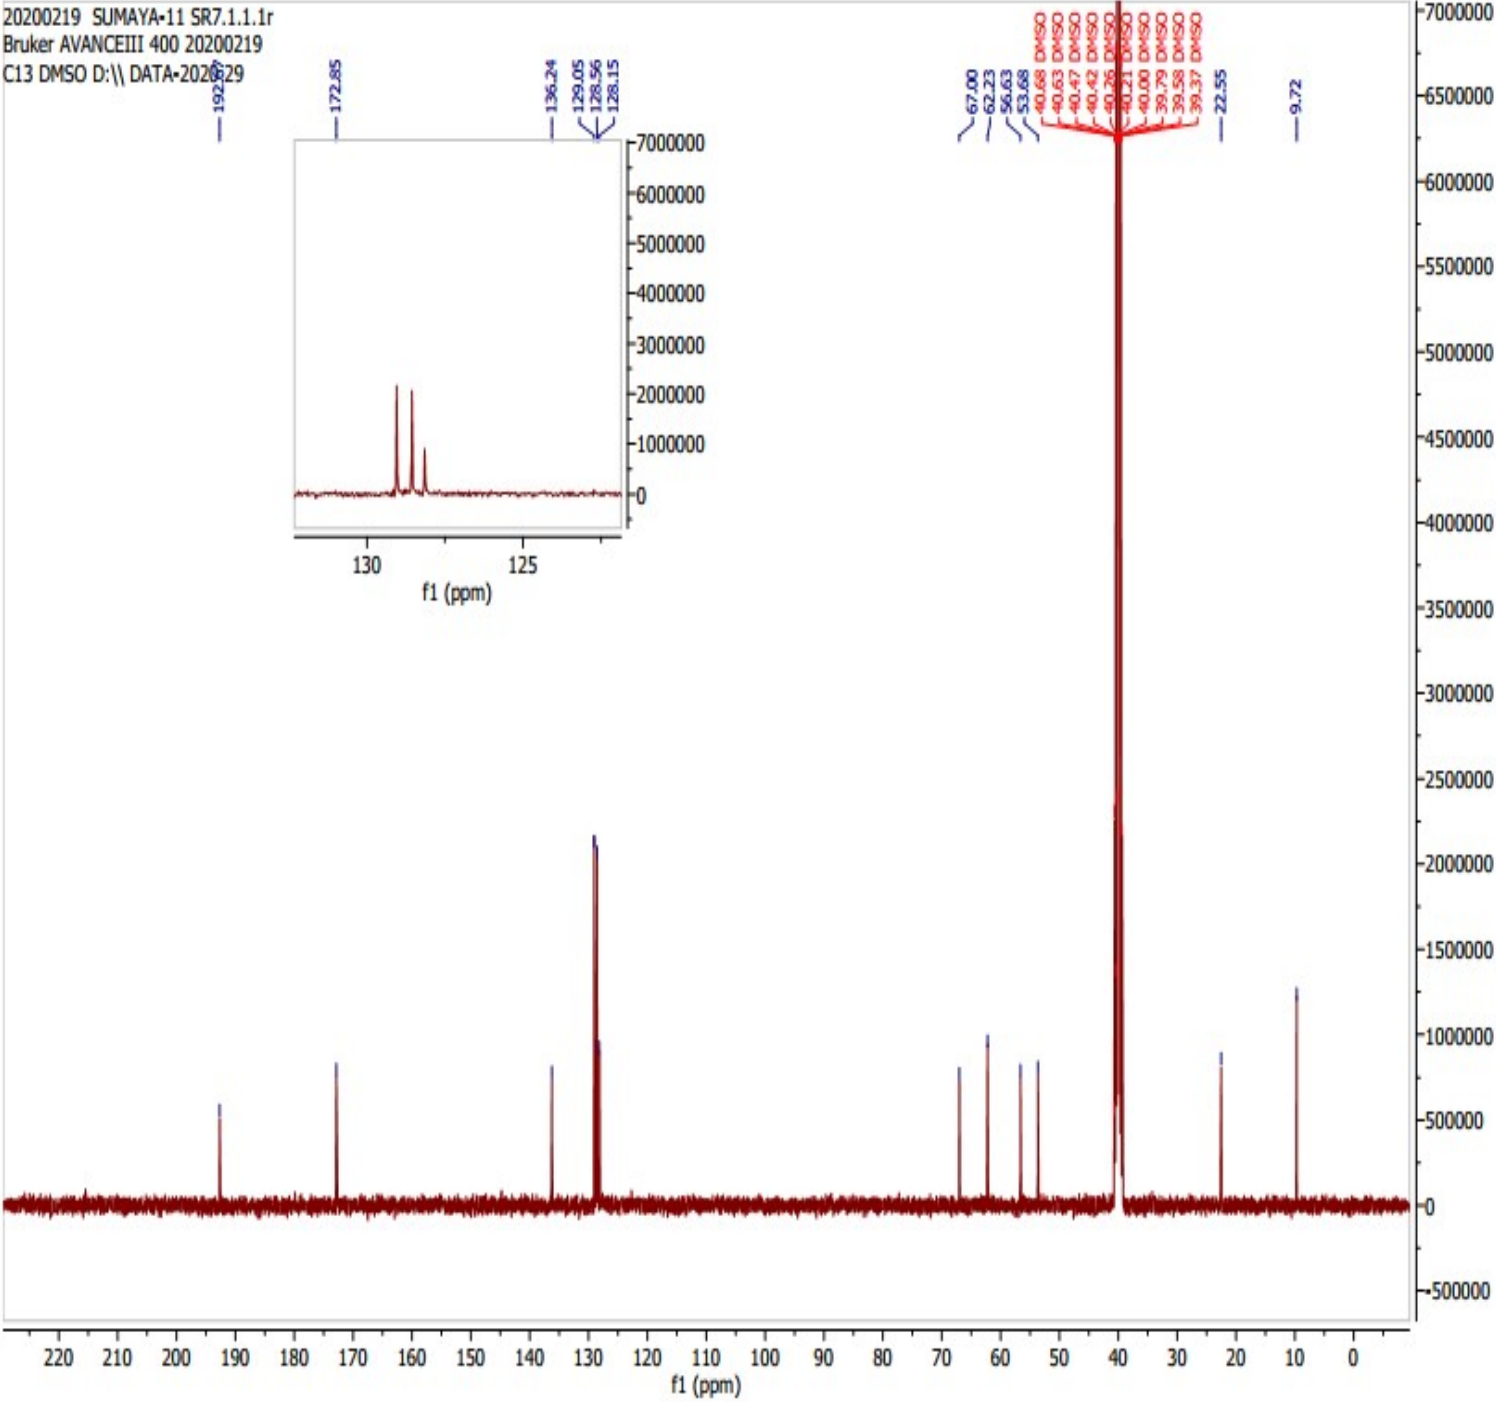

2-(5-(furan-2-ylmethyl)-6-thioxo-1,3,5-thiadiazinan-3-yl)butanoic acid (4g)

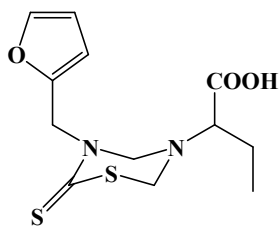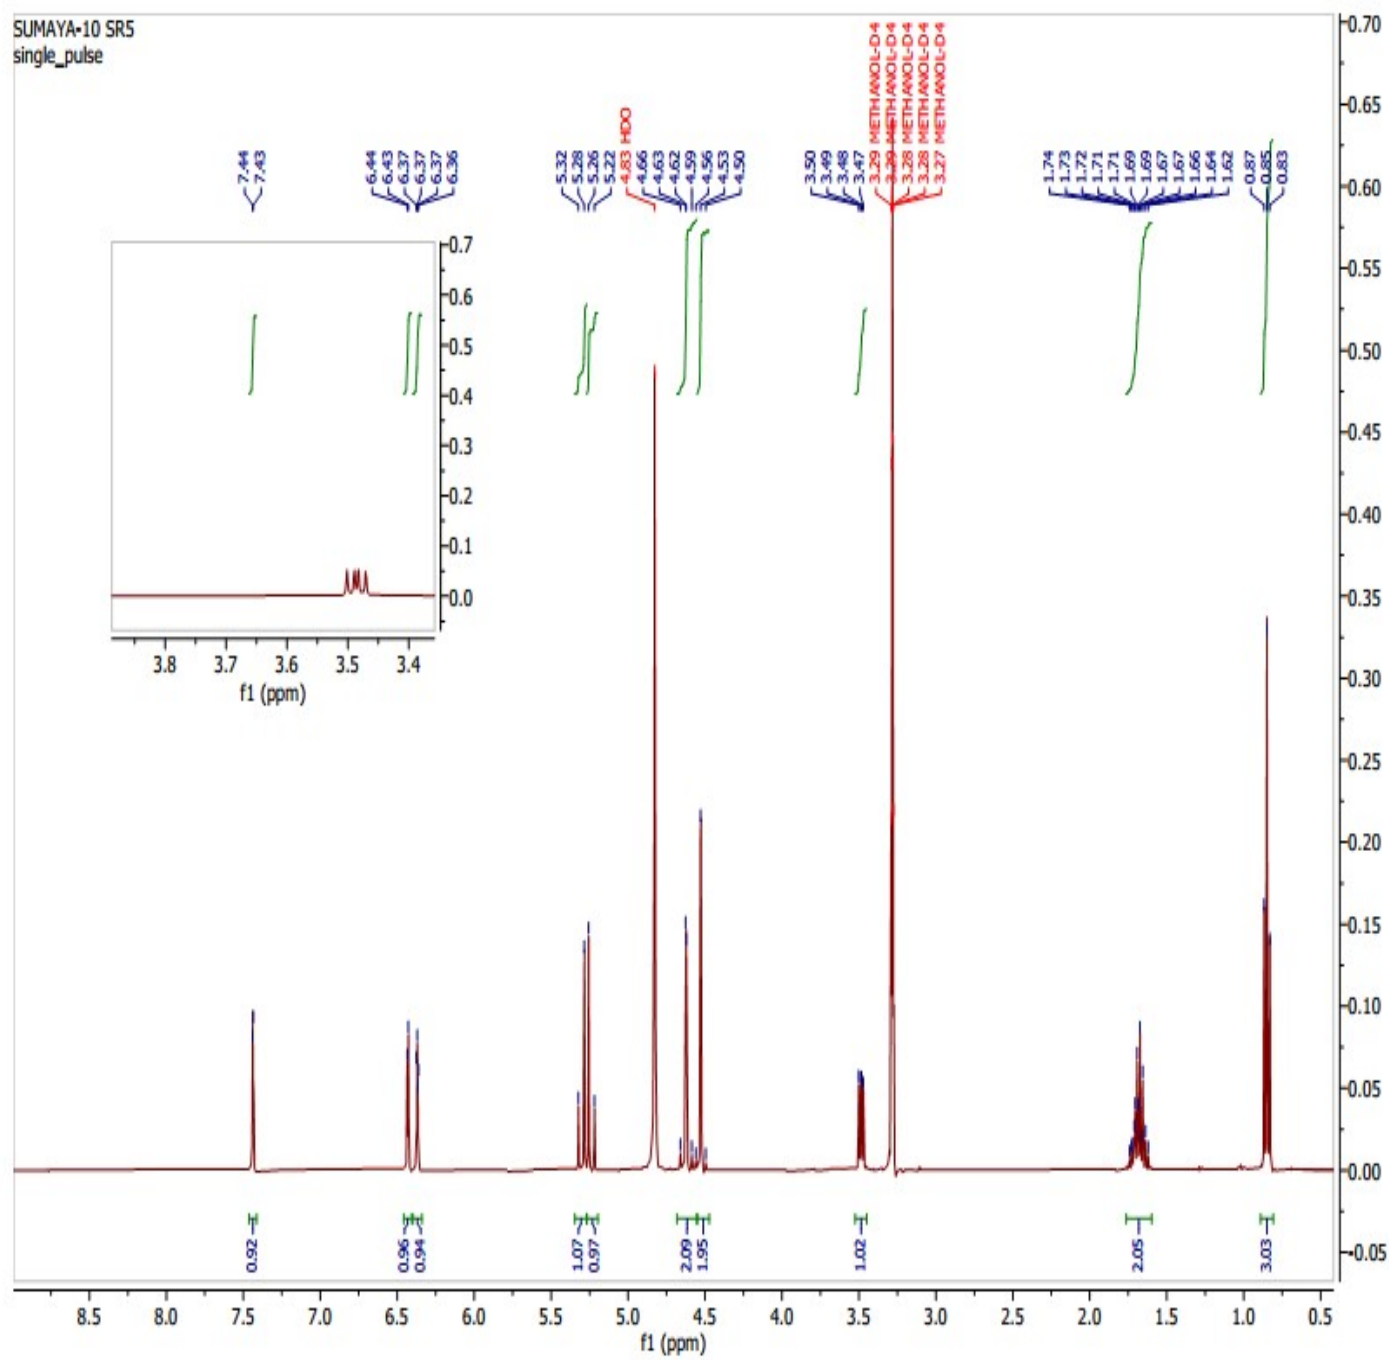

20200219 SUMAYA-10 SR5.1.1.1r  
Bruker AVANCEIII 400 20200219  
C13 MeOD D:\\ DATA-2020\\32

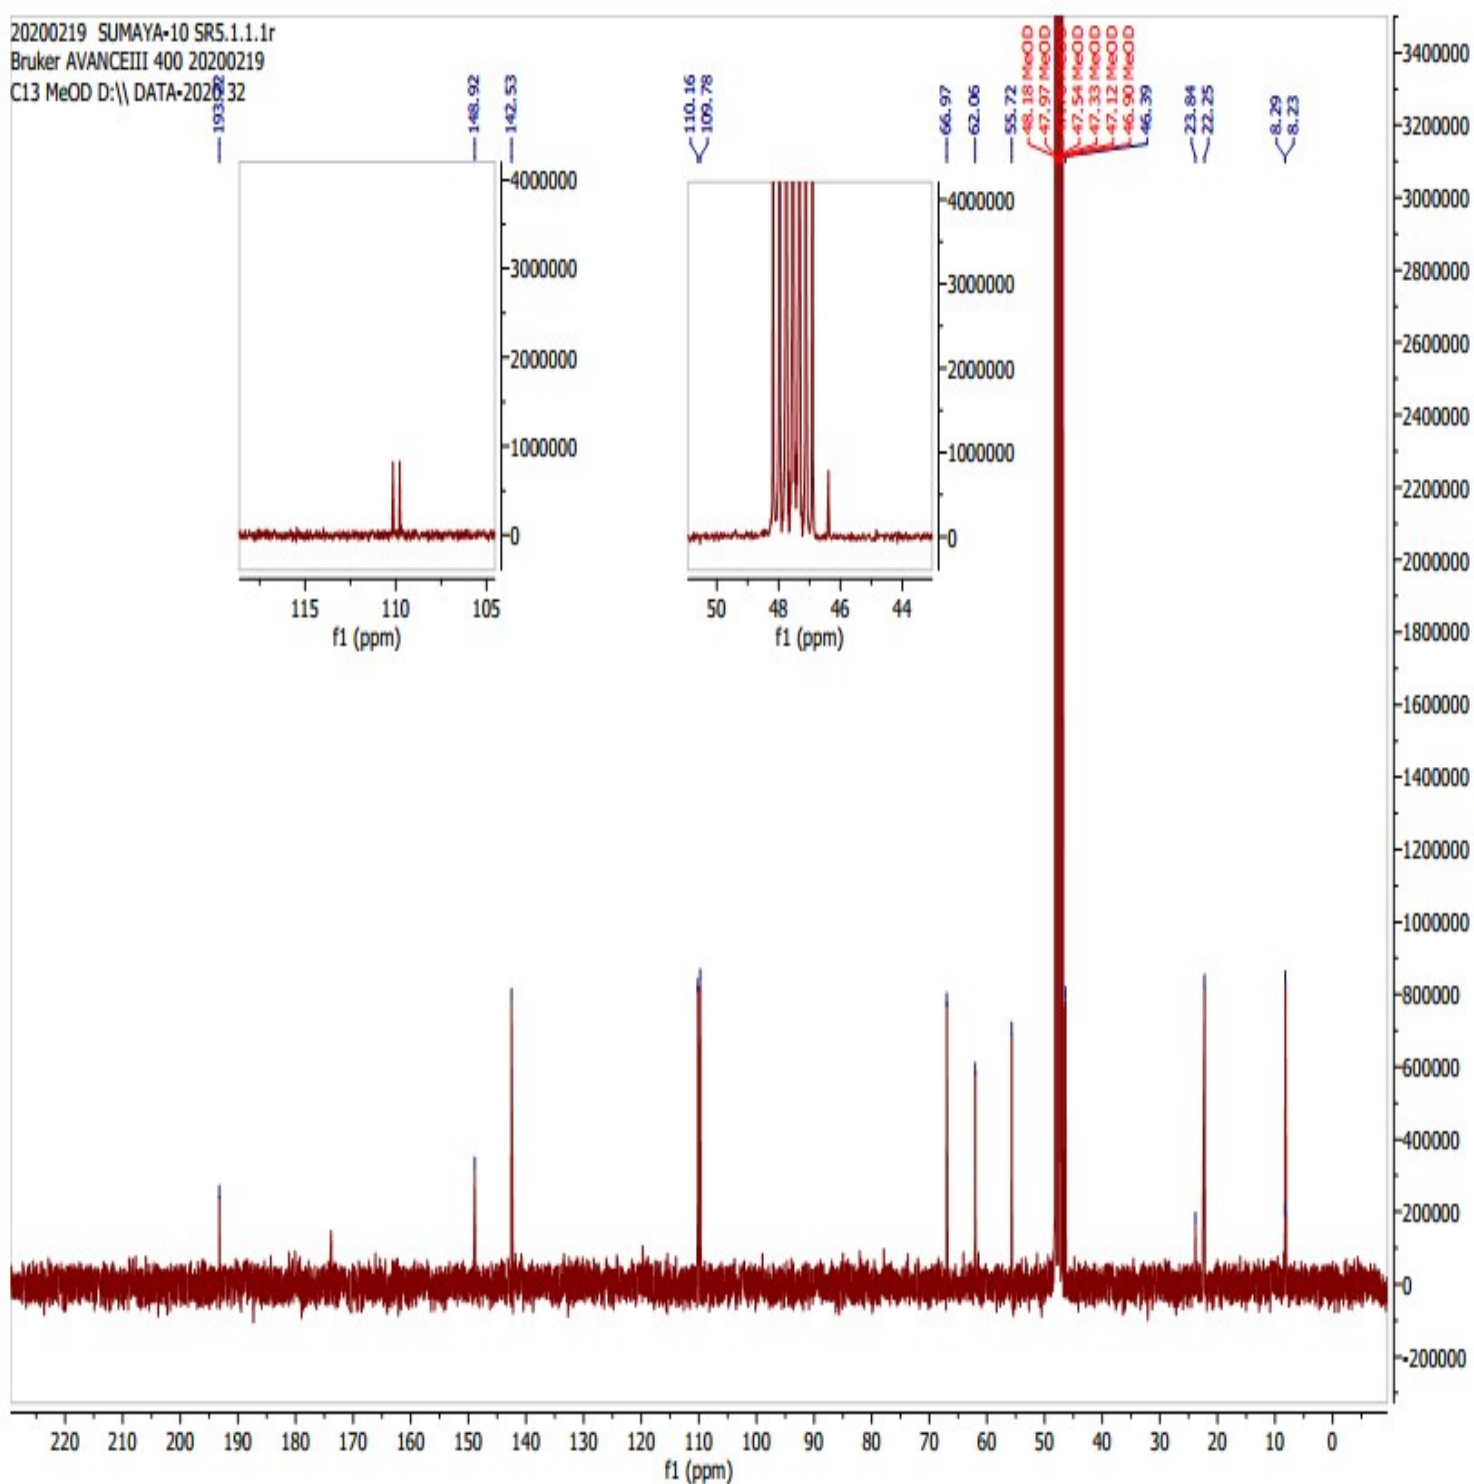

2-(5-phenyl-6-thioxo-1,3,5-thiadiazinan-3-yl)butanoic acid (4h)

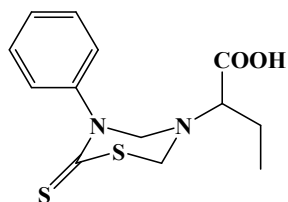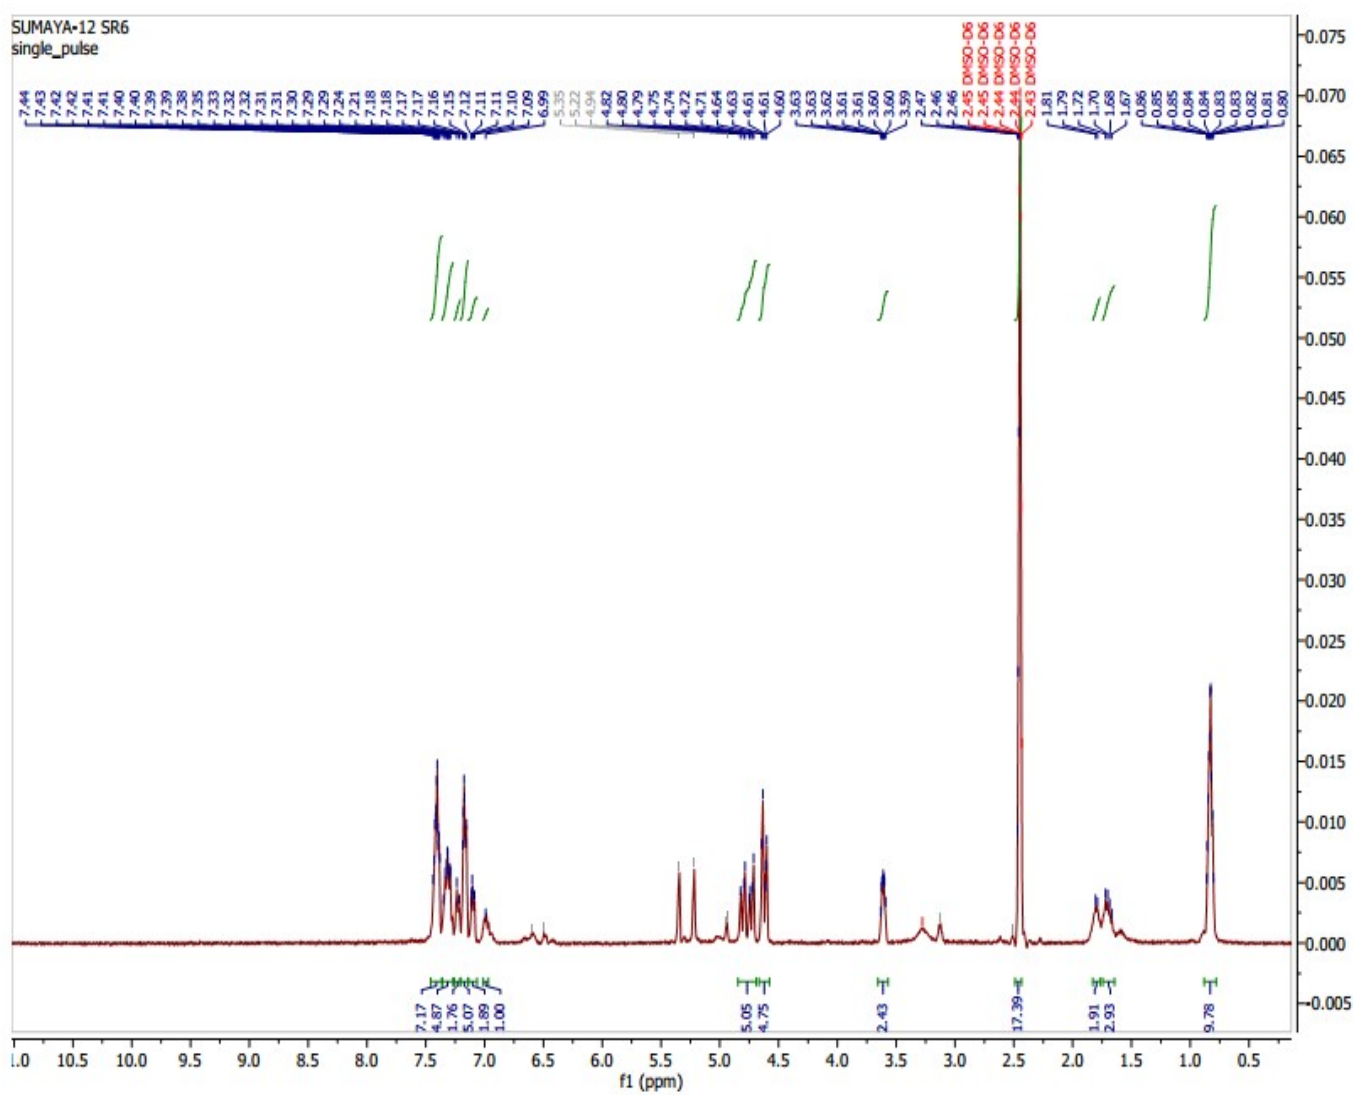

# Synthesis of 2-(5-cyclohexyl-6-thioxo-1,3,5-thiadiazinan-3-yl)butanoic acid (4i)

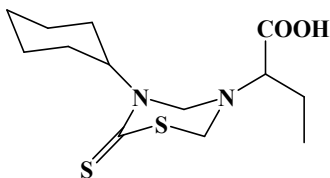

SR-19\_1HNMR\_DMSO

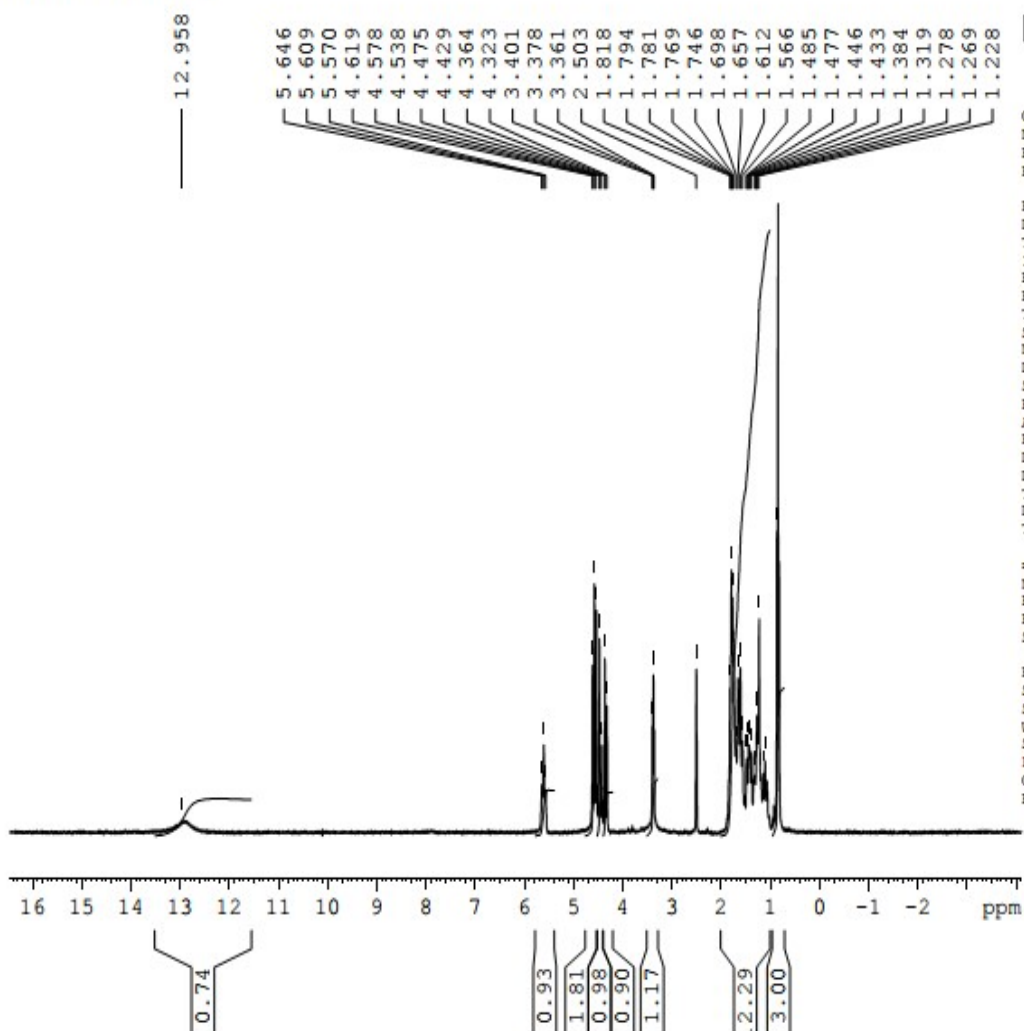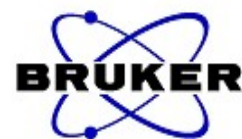

Current Data Parameters  
NAME SR-19\_1HNMR\_DMSO  
EXPNO 1  
PROCNO 1

F2 - Acquisition Parameters  
Date\_ 20210118  
Time 10.52  
INSTRUM spect  
PROBHD 5 mm BBO BB-1H  
PULPROG zg30  
TD 65536  
SOLVENT DMSO  
NS 2  
DS 0  
SWH 6172.839 Hz  
FIDRES 0.094190 Hz  
AQ 5.3084660 sec  
RG 4  
DW 81.000 usec  
DE 6.00 usec  
TE 292.2 K  
D1 1.00000000 sec  
TD0 1

===== CHANNEL f1 =====  
NUC1 1H  
P1 9.00 usec  
PL1 2.00 dB  
SFO1 300.1318534 MHz

F2 - Processing parameters  
SI 32768  
SF 300.1300000 MHz  
WDW EM  
SSB 0  
LB 0.30 Hz  
GB 0  
PC 1.00



SR-19\_13CNMR\_DMSO

190.82  
173.16

63.54  
61.76  
58.30  
54.38  
40.77  
40.49  
40.21  
39.93  
39.65  
39.37  
39.10  
28.80  
28.50  
25.82  
25.65  
25.18  
22.91  
9.74

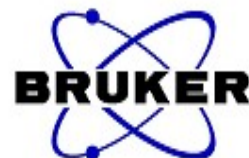

Current Data Parameters  
NAME SR-19\_13CNMR\_DMSO  
EXPNO 1  
PROCNO 1

F2 - Acquisition Parameters  
Date\_ 20210118  
Time 10.50  
INSTRUM spect  
PROBHD 5 mm BBO BB-1H  
PULPROG zgpg30  
TD 35968  
SOLVENT DMSO  
NS 46  
DS 0  
SWH 17985.611 Hz  
FIDRES 0.500045 Hz  
AQ 0.9999604 sec  
RG 29193  
DM 27.800 usec  
DE 6.00 usec  
TE 292.5 K  
D1 2.00000000 sec  
d11 0.03000000 sec  
DELTA 1.89999998 sec  
TD0 1

===== CHANNEL f1 =====  
NUC1 13C  
P1 6.00 usec  
PL1 -5.00 dB  
SFO1 75.4752953 MHz

===== CHANNEL f2 =====  
CPDPRG2 waltz16  
NUC2 1H  
PCPD2 80.00 usec  
PL2 2.00 dB  
PL12 20.98 dB  
PL13 20.00 dB  
SFO2 300.1312005 MHz

F2 - Processing parameters  
SI 32768  
SF 75.4677490 MHz  
WDW EM  
SSB 0  
LB 1.00 Hz  
GB 0  
PC 1.40

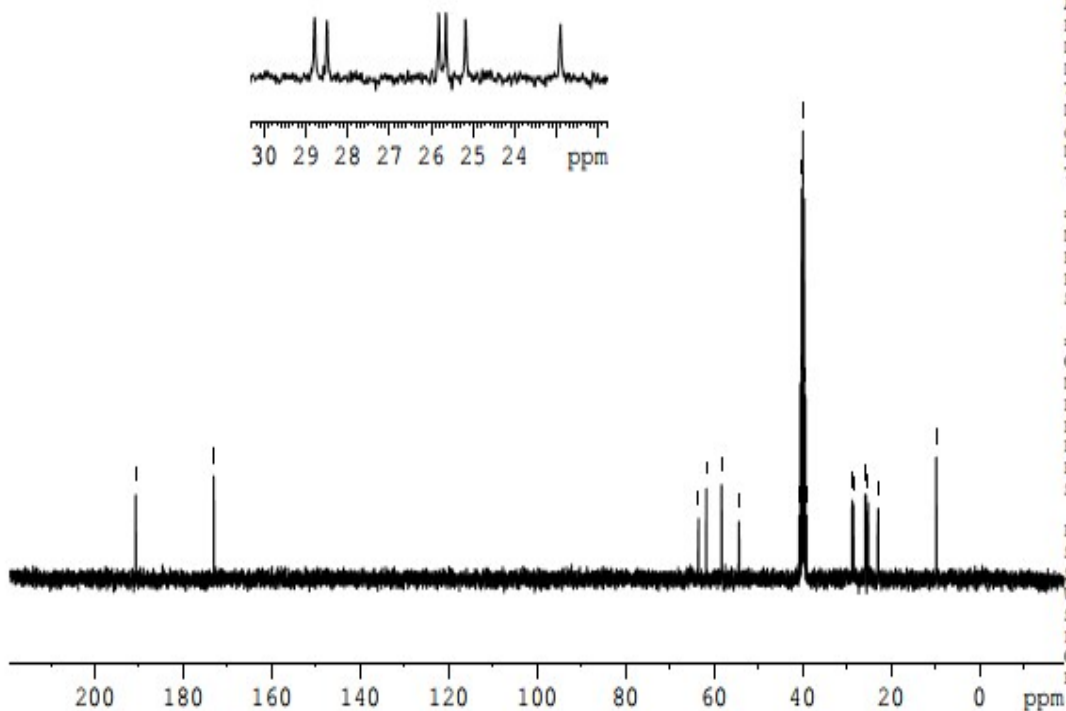



2-(5-benzyl-2-thioxo-1,3,5-thiadiazinan-3-yl)butanoic acid (5a)

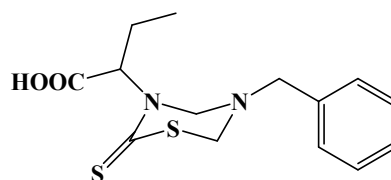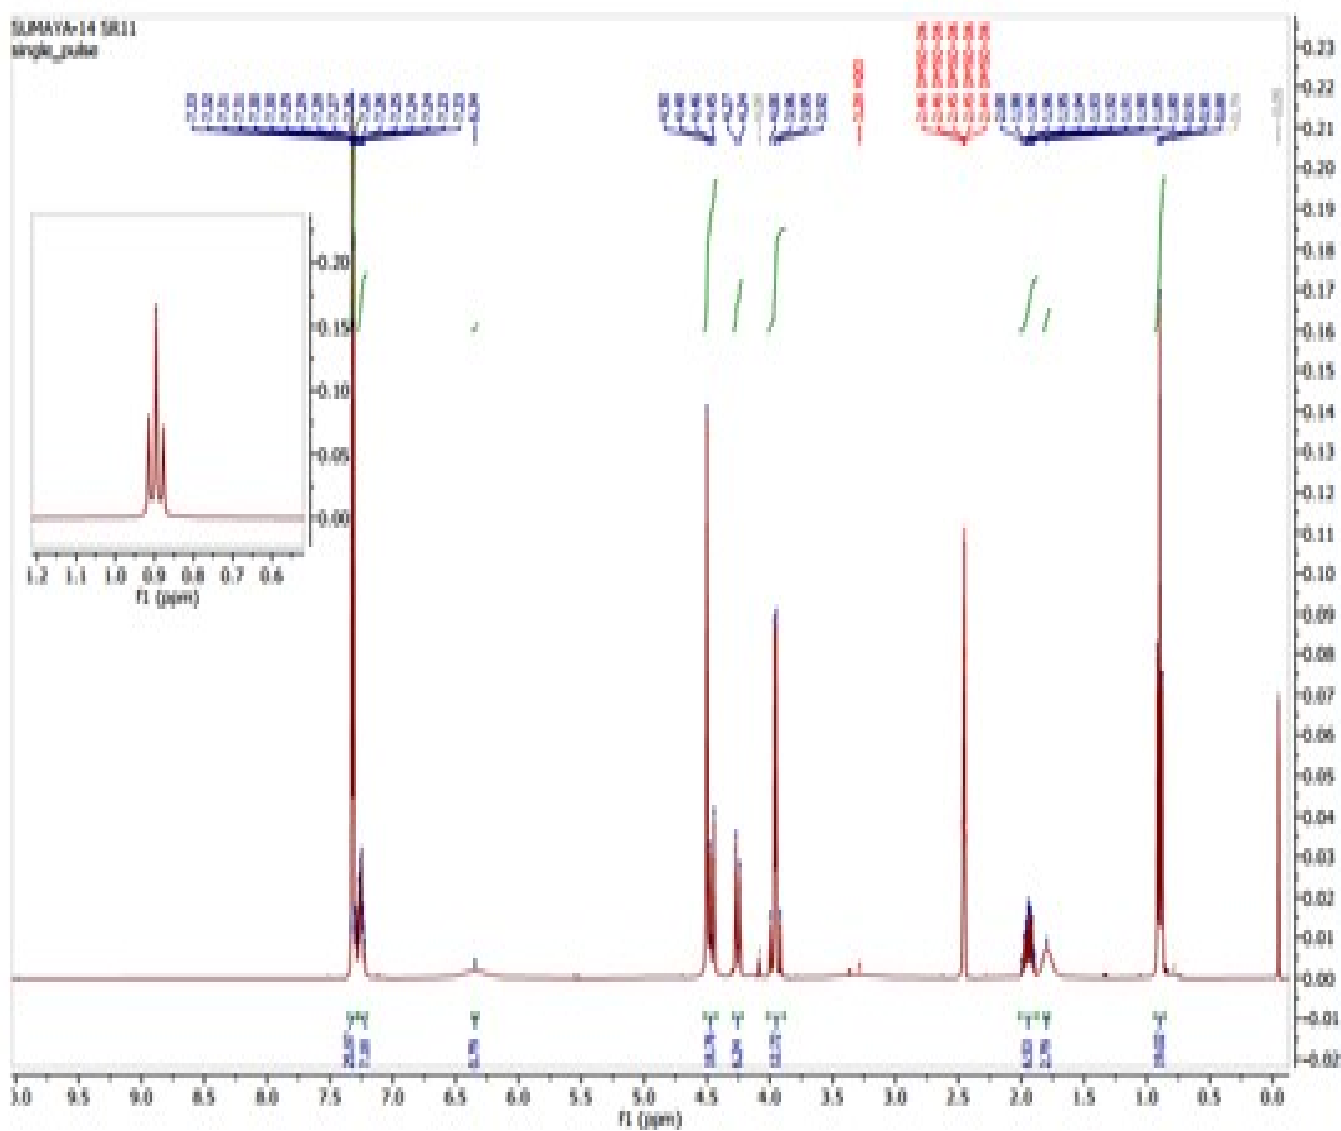

20200219 SUMAYA-10 SR5.1.1.1r  
Bruker AVANCEIII 400 20200219  
C13 MeOD D:\\ DATA-2020 32

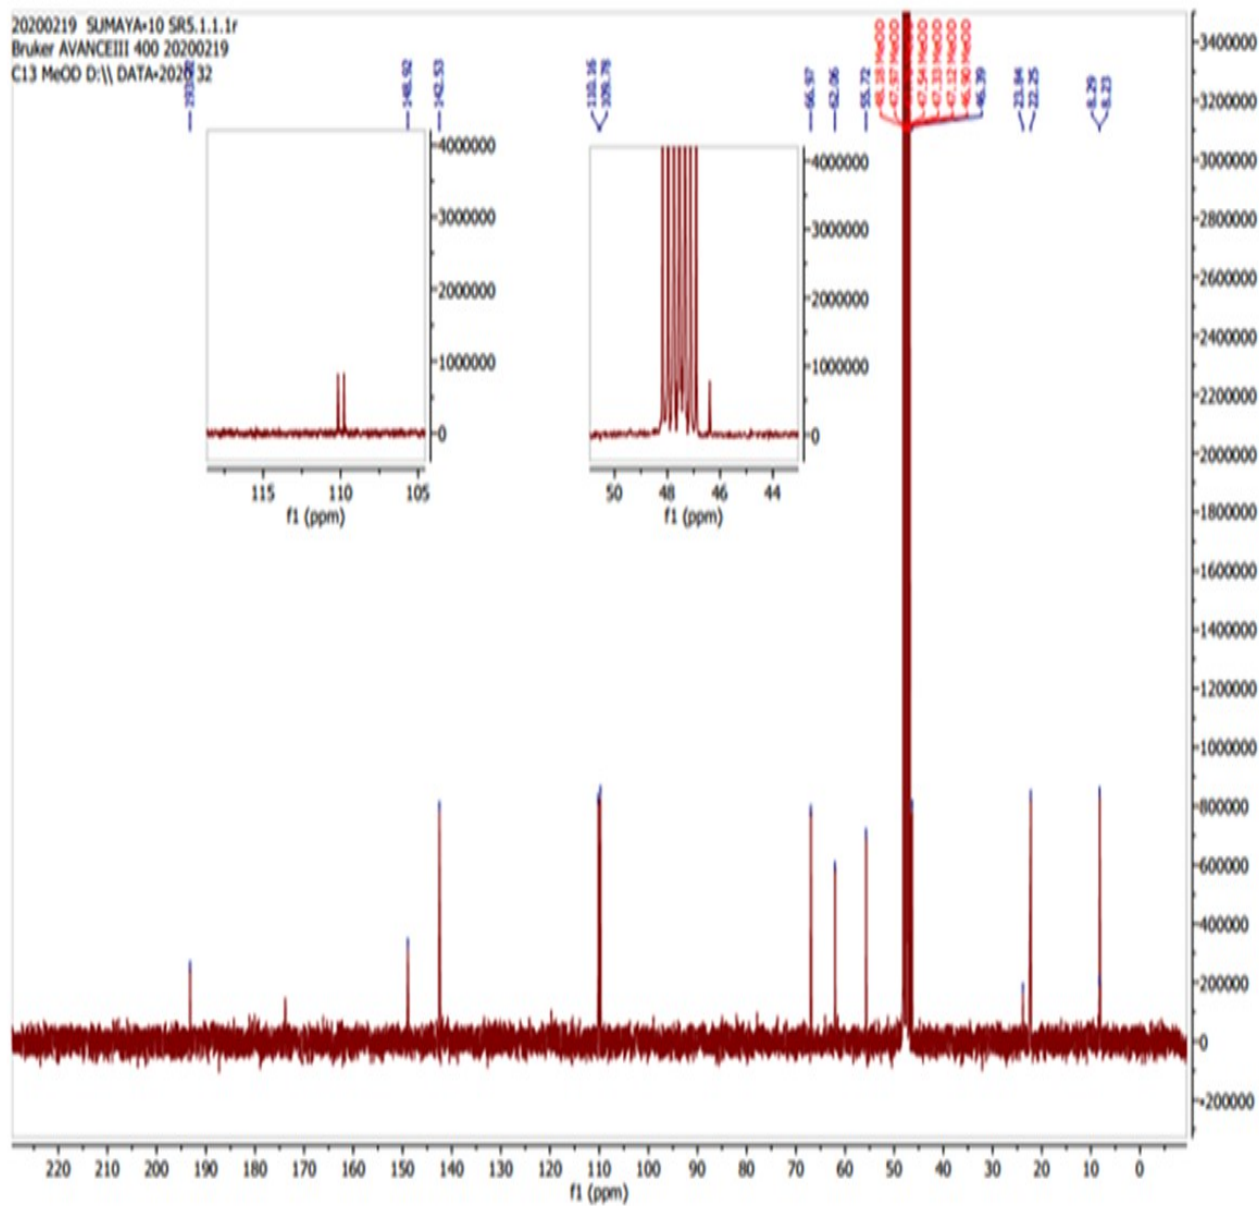

2-(5-(furan-2-ylmethyl)-2-thioxo-1,3,5-thiadiazinan-3-yl)butanoic acid (5b)

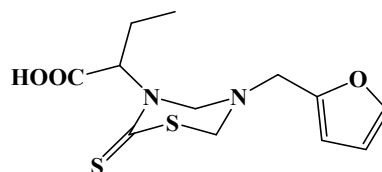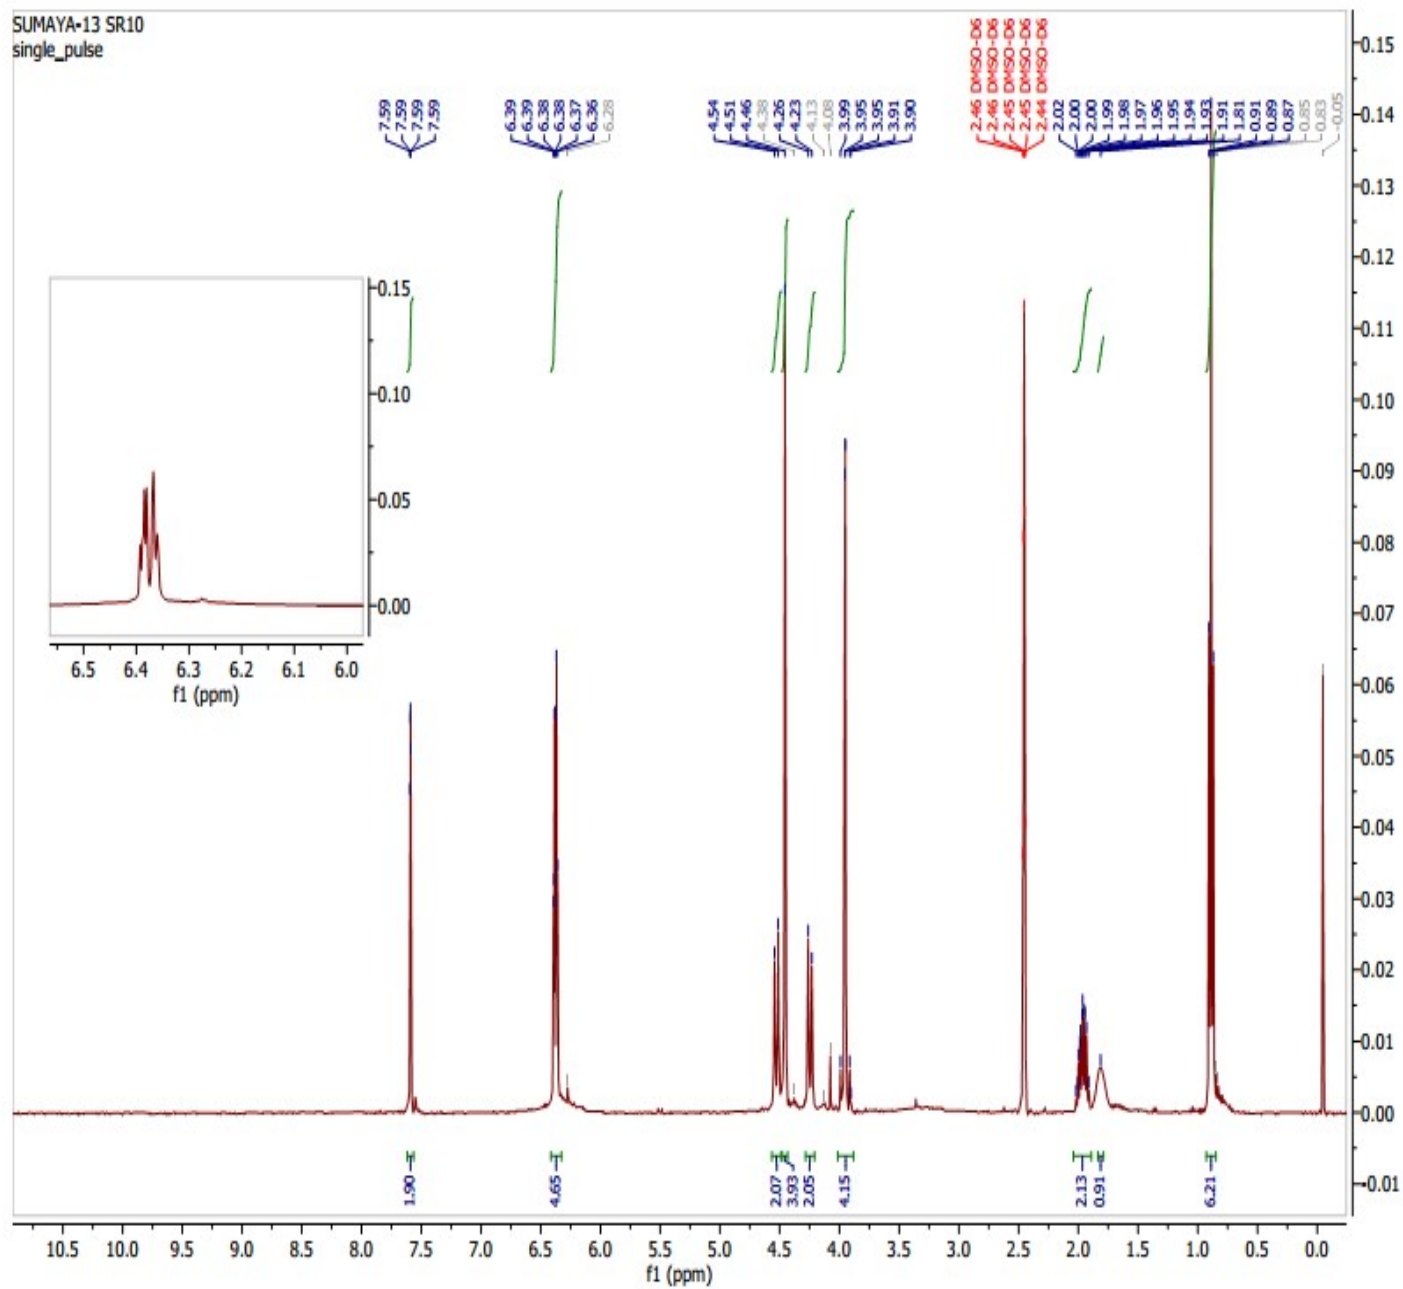

# 5-(furan-2-ylmethyl)-3-phenyl-1,3,5-thiadiazinane-2-thione (5c)

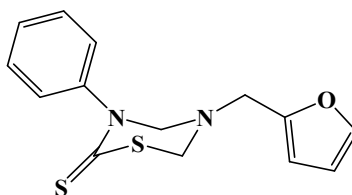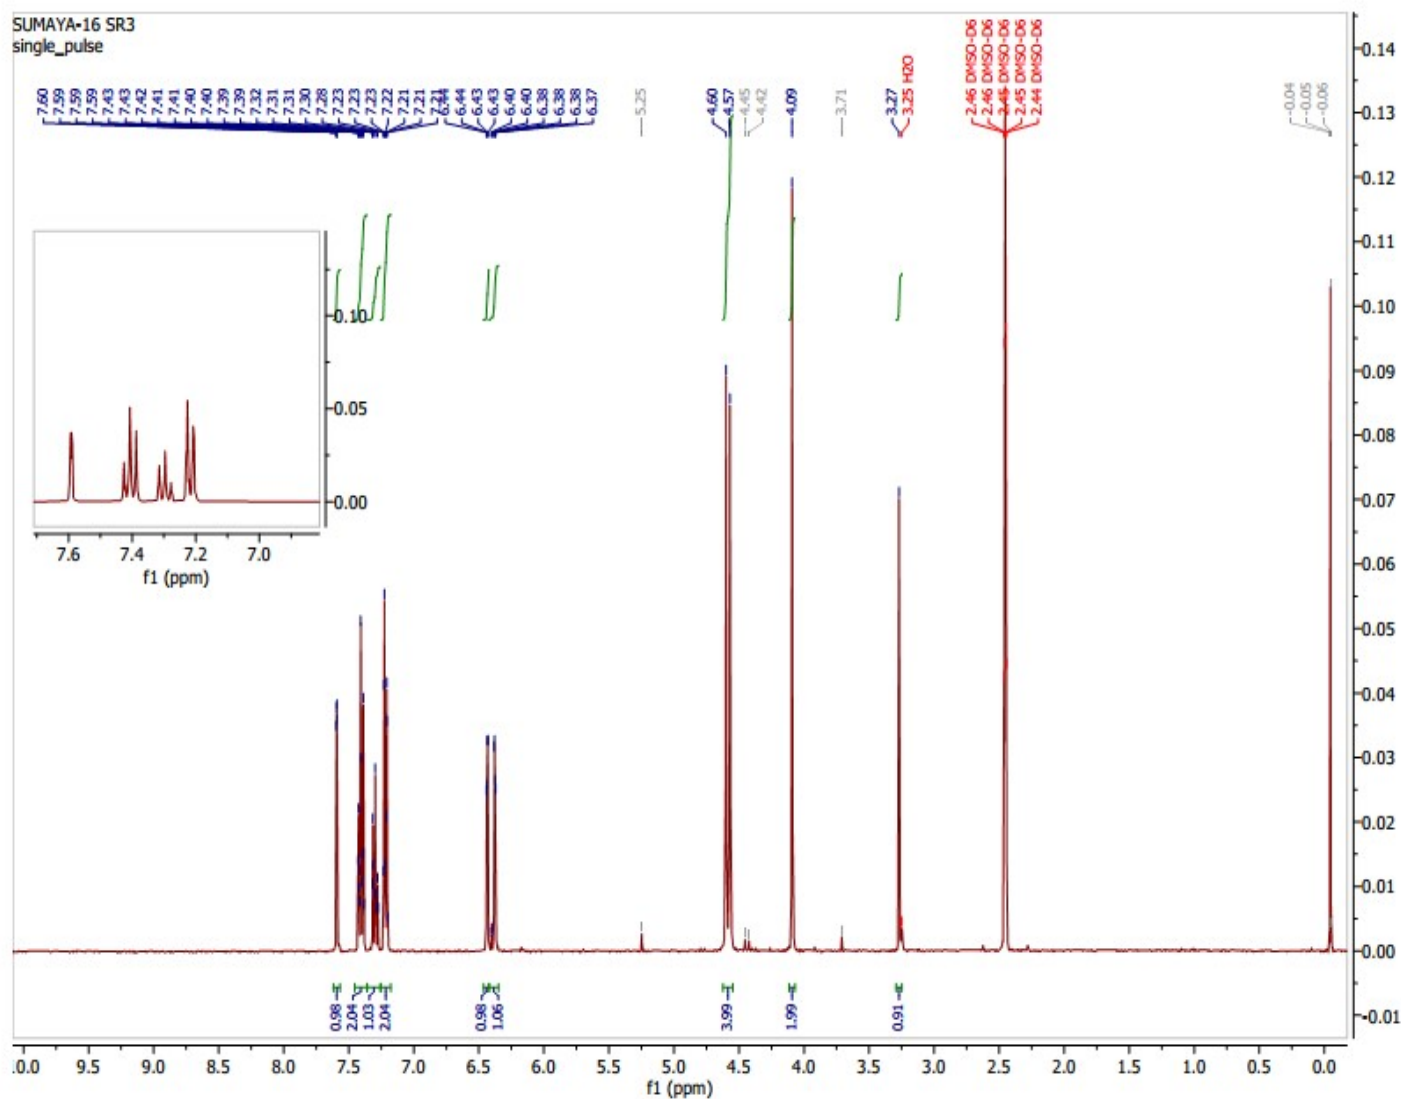



**2-(5-(2-hydroxyethyl)-6-thioxo-1,3,5-thiadiazinan-3-yl)acetic acid (5d)**

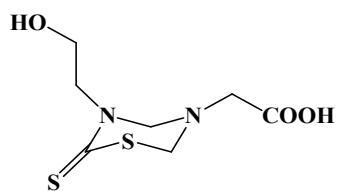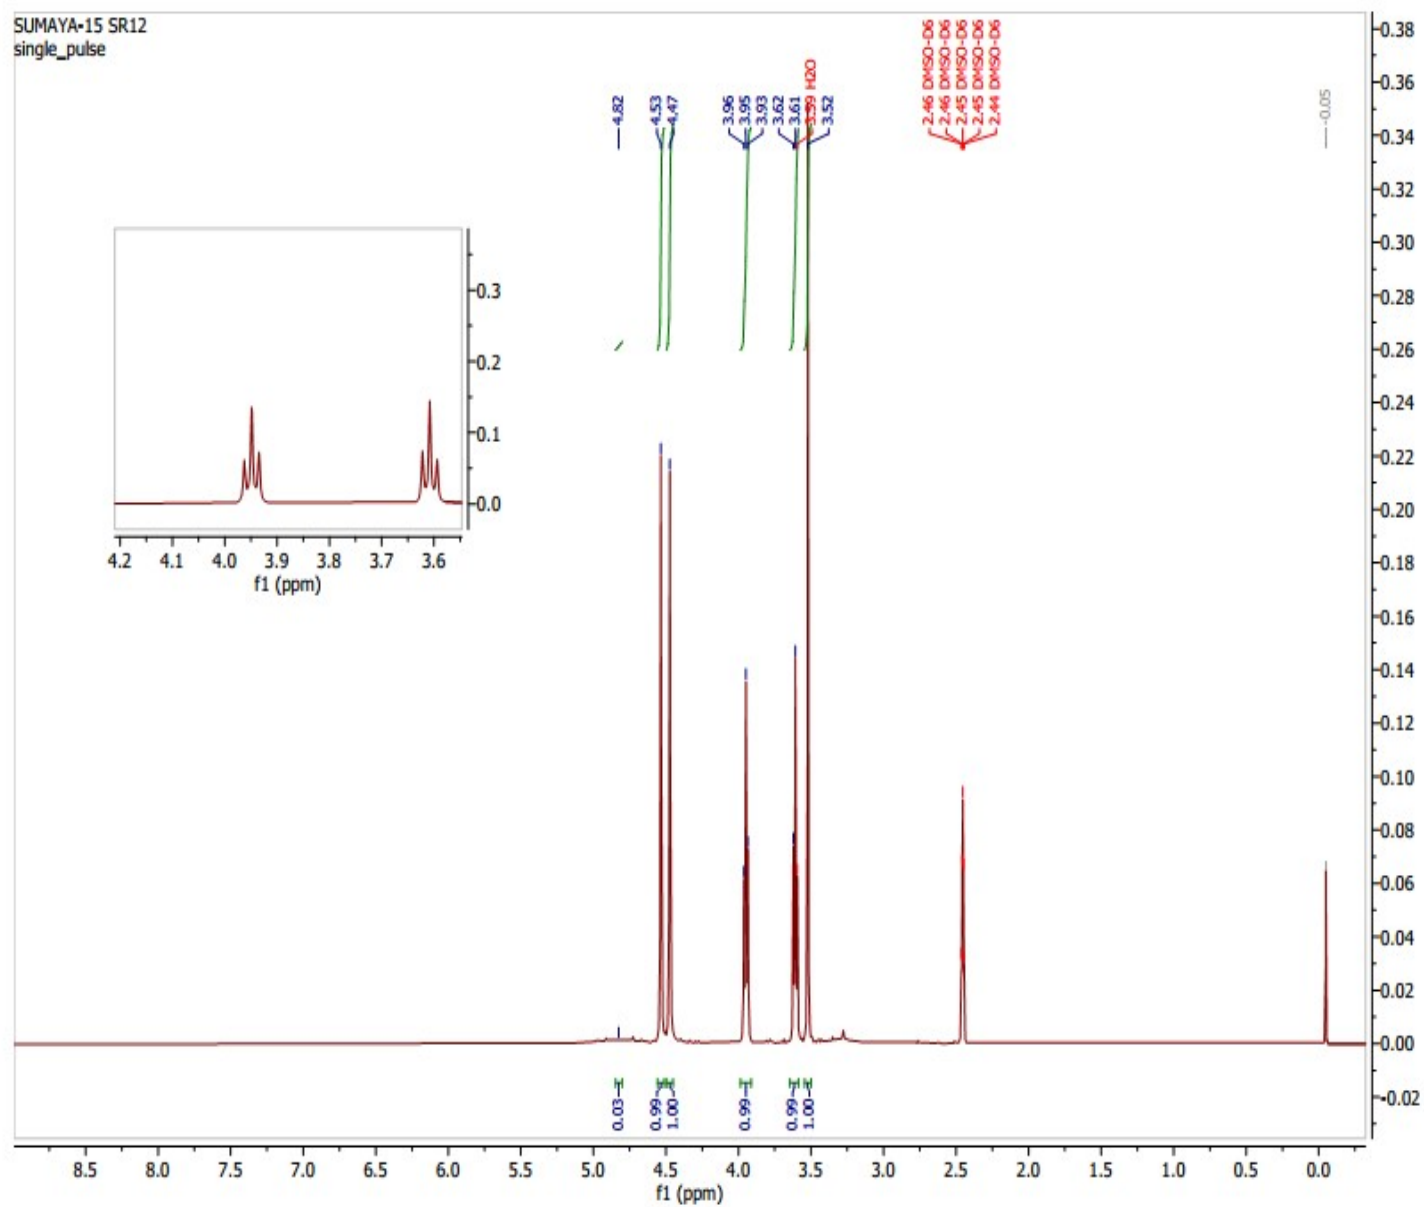

20200219 SUMAYA-15 SR12.1.1.1r  
Bruker AVANCEIII 400 20200219  
C13 DMSO D:\ DATA-20200219

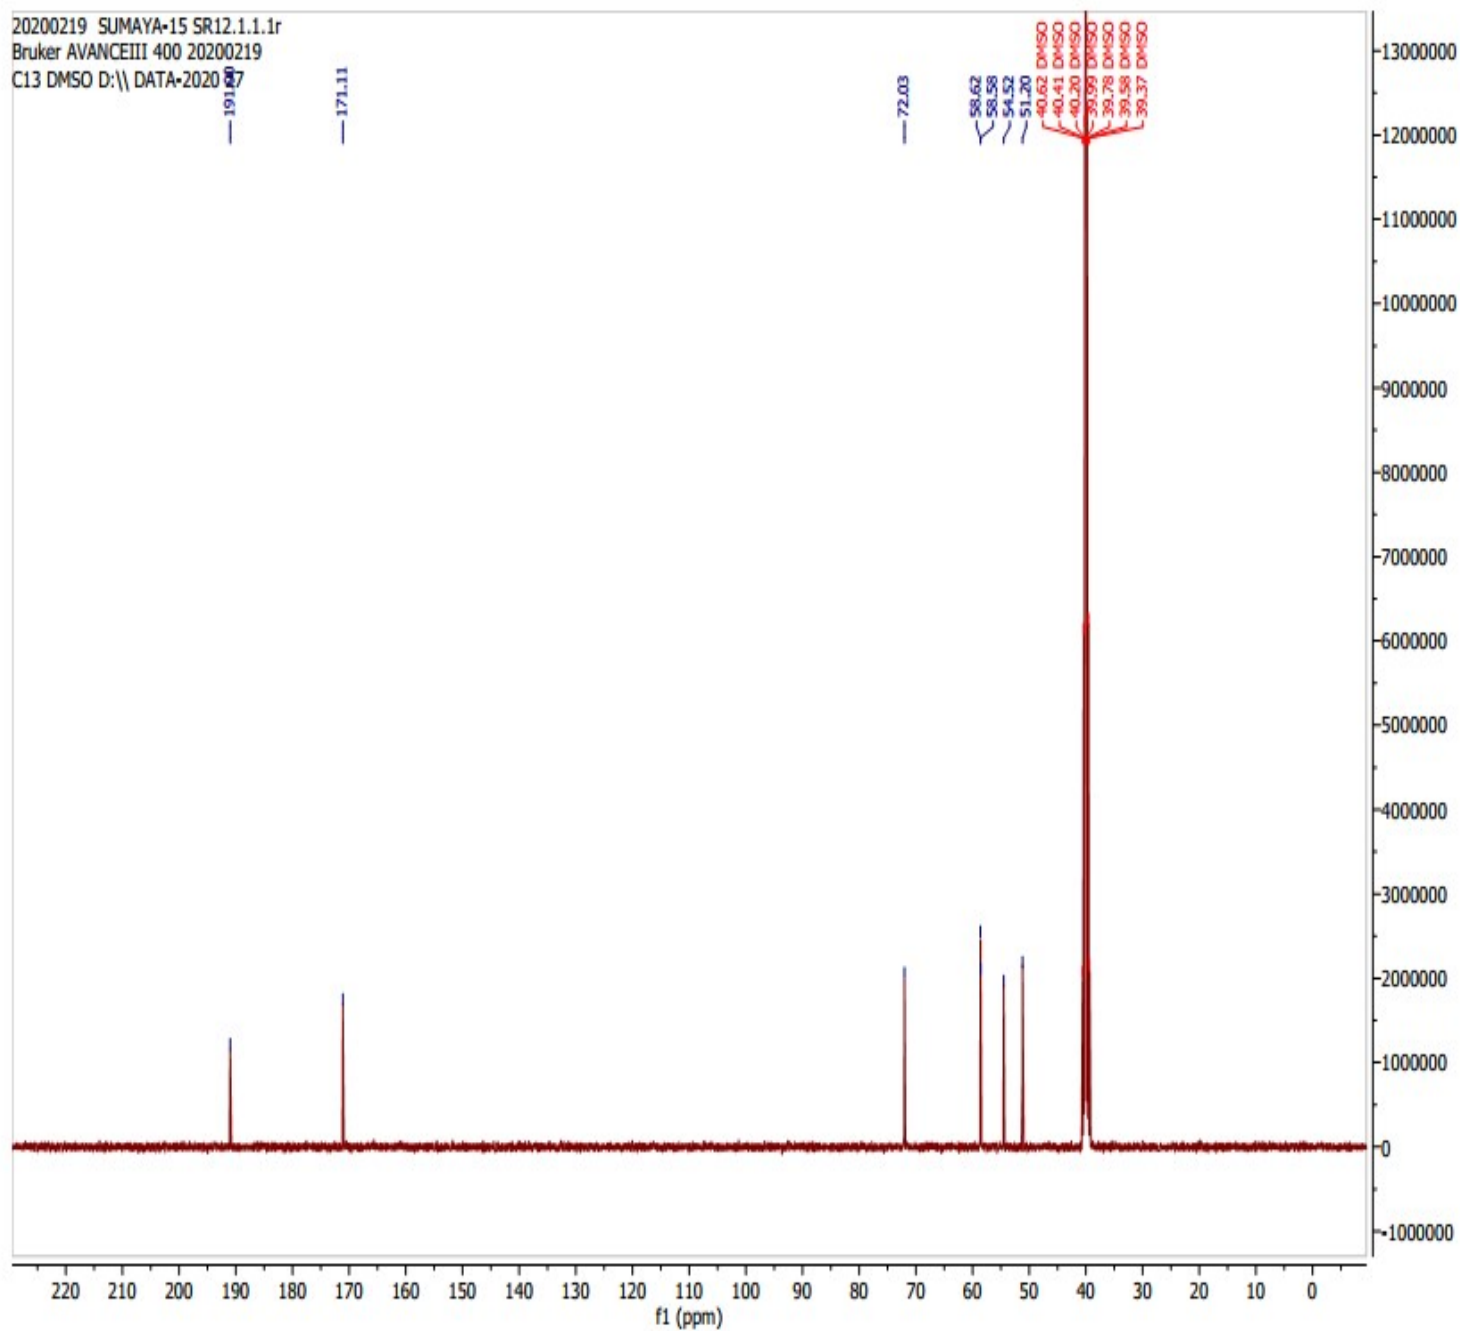

3-methyl-5-(pyridin-4-yl)-1,3,5-thiadiazinane-2-thione (5e)

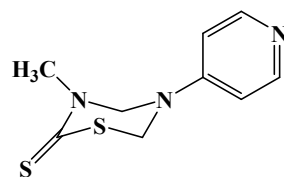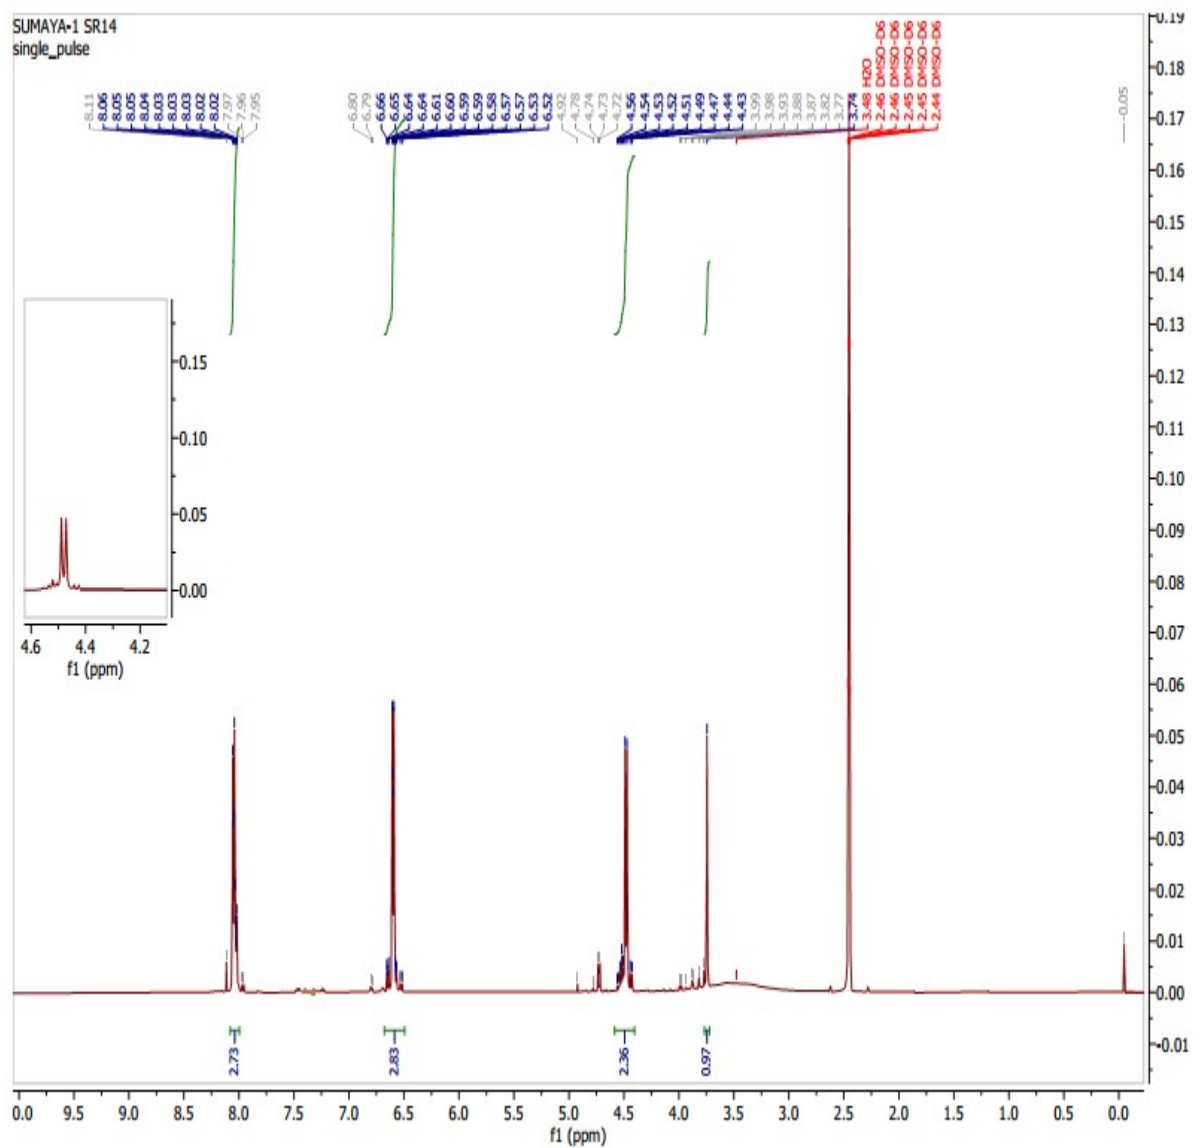



**Synthesis of 2-(5-cyclohexyl-2-thioxo-1,3,5-thiadiazinan-3-yl)butanoic acid (5f)**

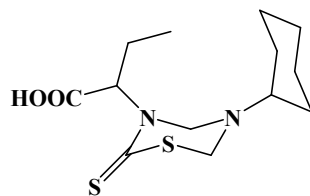

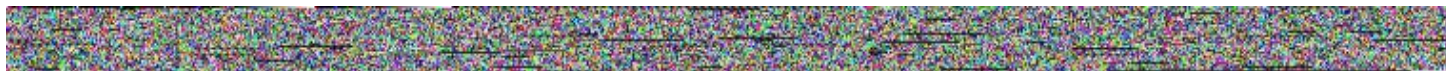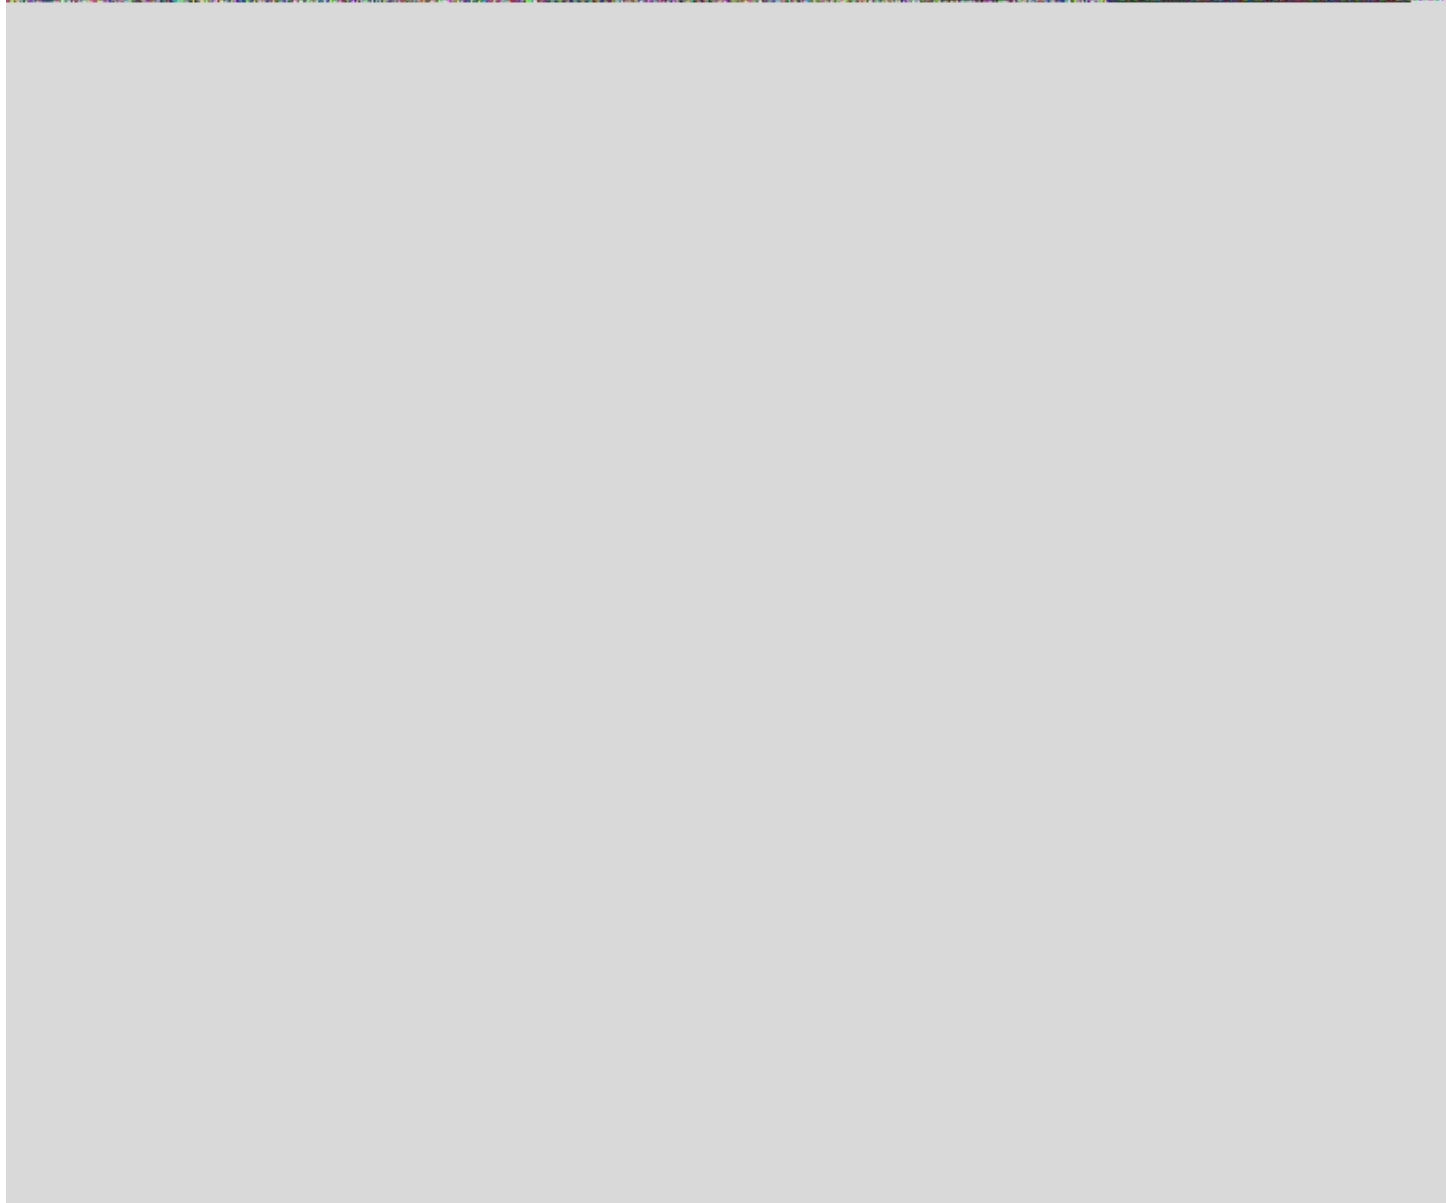

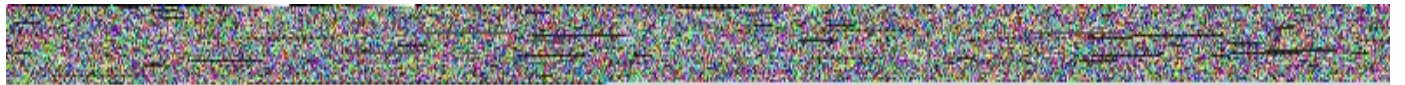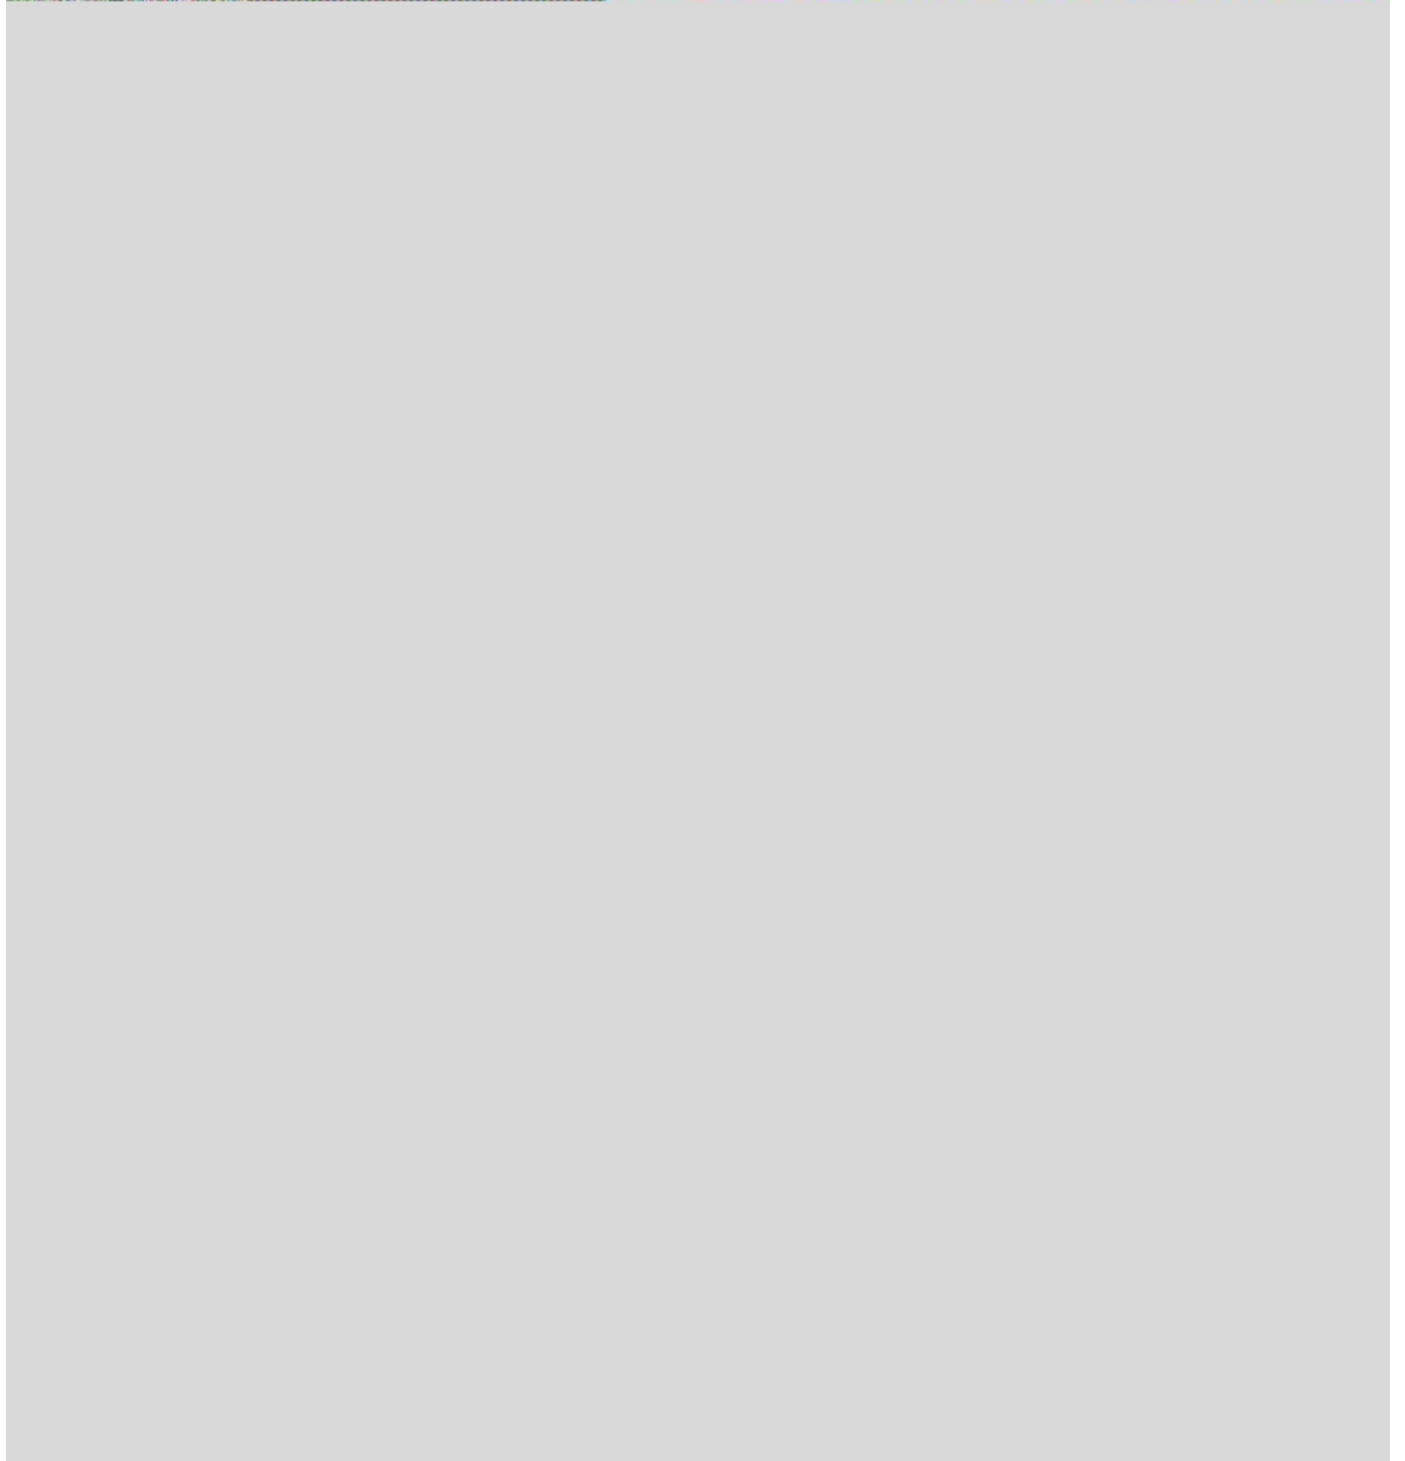

# Synthesis of 3,5-diisopropyl-1,3,5-thiadiazinane-2-thione (5g)

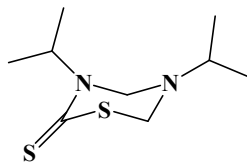

SR-18\_1HNMR\_DMSO

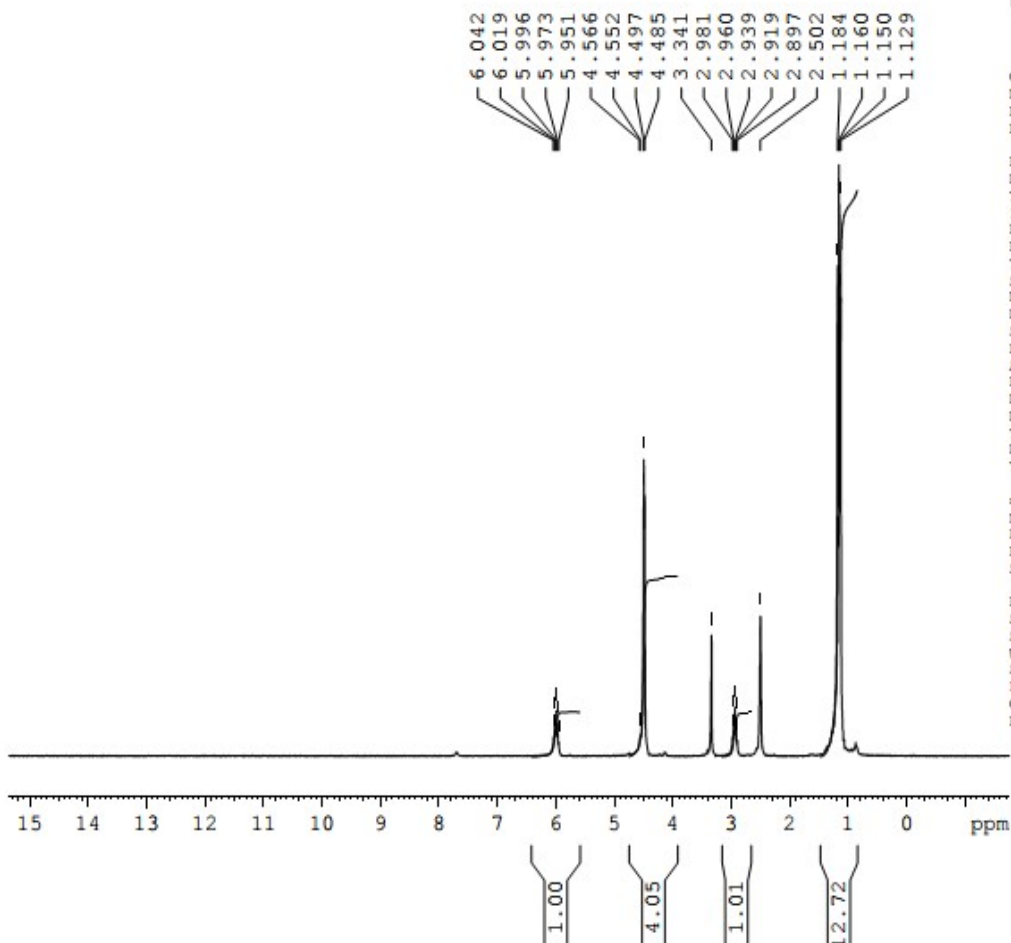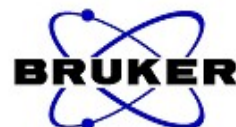

Current Data Parameters  
NAME SR-18\_1HNMR\_DMSO  
EXPNO 1  
PROCNO 1

F2 - Acquisition Parameters  
Date\_ 20210118  
Time 11.11  
INSTRUM spect  
PROBHD 5 mm BBO BB-1H  
PULPROG zg30  
TD 65536  
SOLVENT DMSO  
NS 4  
DS 0  
SWH 6172.839 Hz  
FIDRES 0.094190 Hz  
AQ 5.3084660 sec  
RG 287.4  
DM 81.000 usec  
DE 6.00 usec  
TE 292.2 K  
D1 1.00000000 sec  
TD0 1

===== CHANNEL f1 =====  
NUC1 1H  
P1 9.00 usec  
PL1 2.00 dB  
SFO1 300.1318534 MHz

F2 - Processing parameters  
SI 32768  
SF 300.1300000 MHz  
WDW EM  
SSB 0  
LB 0.30 Hz  
GB 0  
PC 1.00

SR-18\_13CNMR\_DMSO

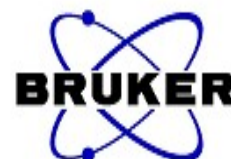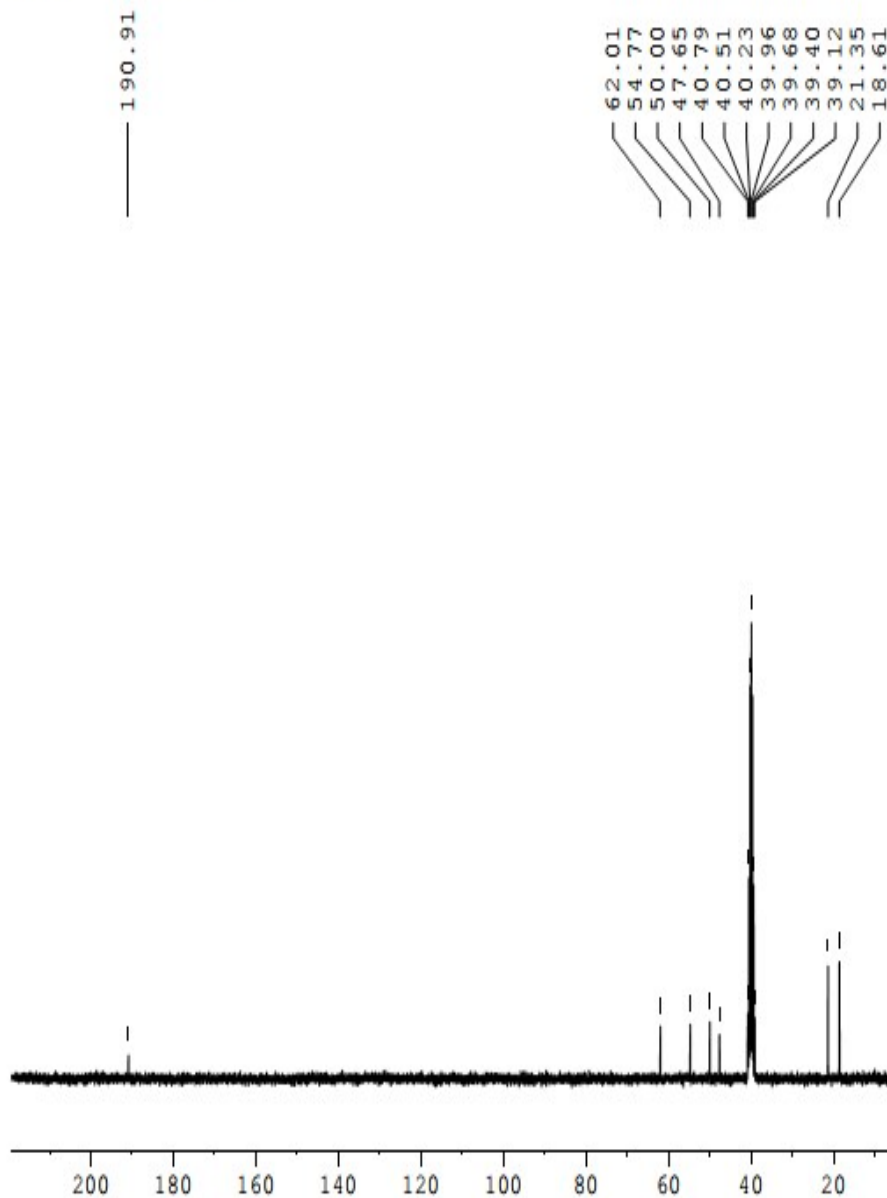

Current Data Parameters  
NAME SR-18\_13CNMR\_DMSO  
EXPNO 1  
PROCNO 1

F2 - Acquisition Parameters  
Date\_ 20210118  
Time 11.08  
INSTRUM spect  
PROBHD 5 mm BBO BB-1H  
PULPROG zgpg30  
TD 35968  
SOLVENT DMSO  
NS 262  
DS 0  
SWH 17985.611 Hz  
FIDRES 0.500045 Hz  
AQ 0.9999604 sec  
RG 20642.5  
DW 27.800 usec  
DE 6.00 usec  
TE 292.6 K  
D1 2.00000000 sec  
d11 0.03000000 sec  
DELTA 1.89999998 sec  
TD0 1

===== CHANNEL f1 =====  
NUC1 13C  
P1 6.00 usec  
PL1 -5.00 dB  
SFO1 75.4752953 MHz

===== CHANNEL f2 =====  
CPDPRG2 waltz16  
NUC2 1H  
PCPD2 80.00 usec  
PL2 2.00 dB  
PL12 20.98 dB  
PL13 20.00 dB  
SFO2 300.1312005 MHz

F2 - Processing parameters  
SI 32768  
SF 75.4677490 MHz  
NDM EM  
SSB 0  
LB 1.00 Hz  
GB 0  
PC 1.40

Synthesis of methyl 2-(5-butyl-6-thioxo-1,3,5-thiadiazinan-3-yl)butanoate: An ester analogue (7)

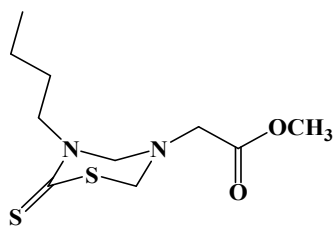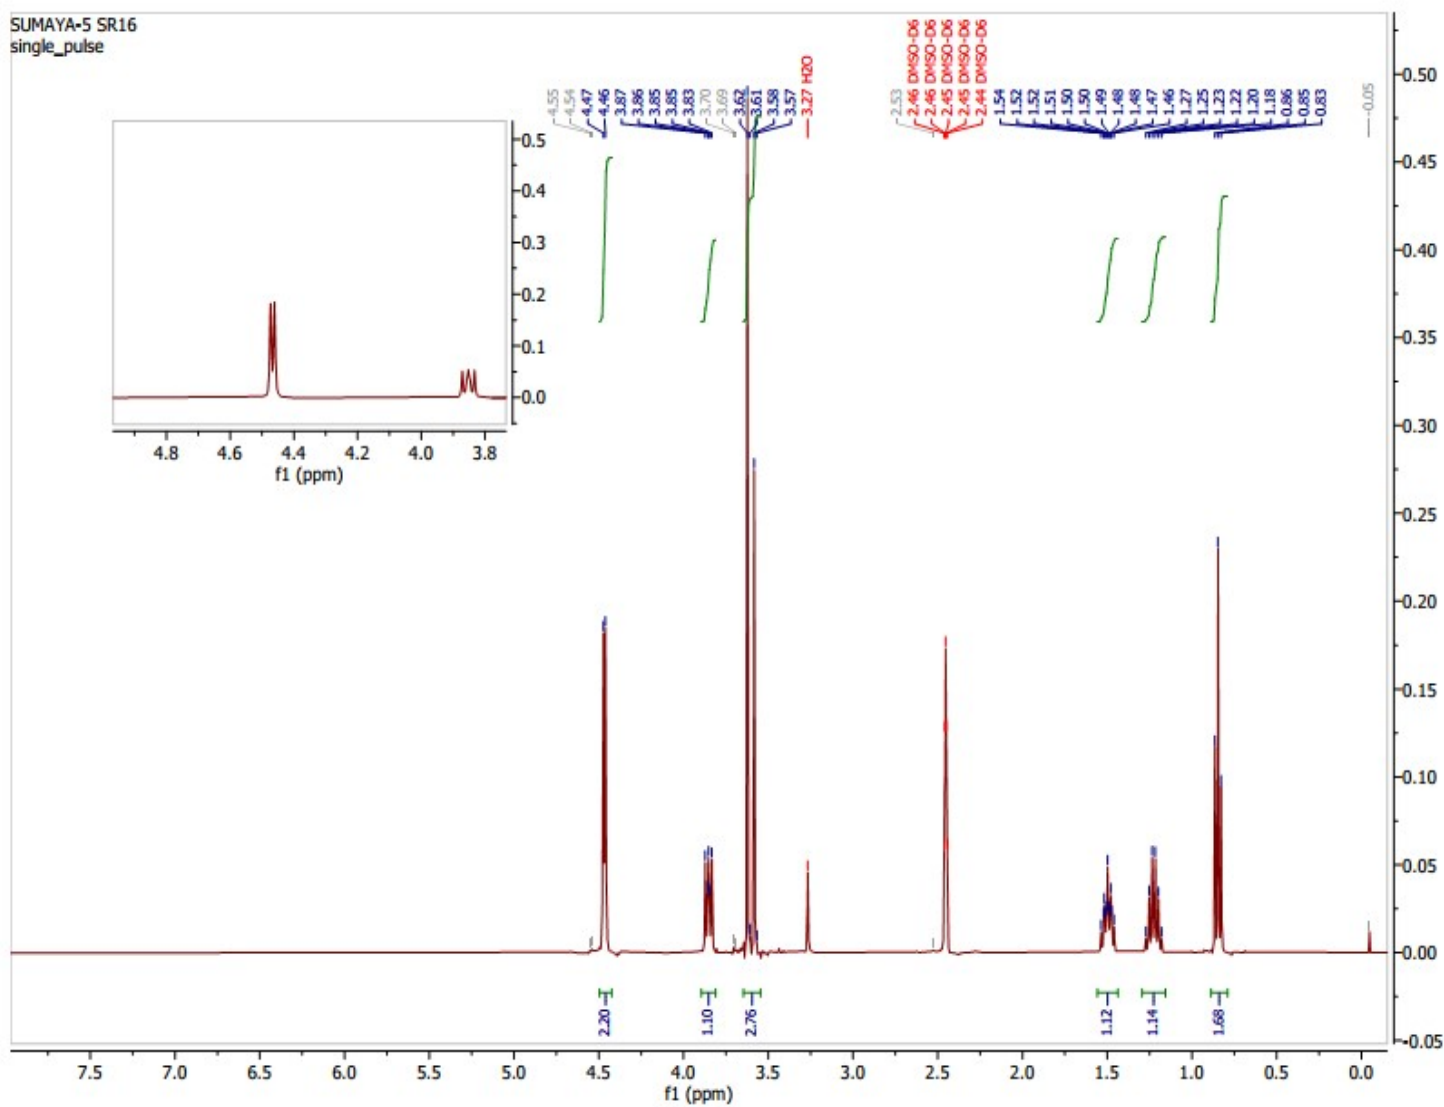

20200219 SUMAYA-S SR16.1.1.17  
Bruker AVANCEIII 400 20200219  
C13 DMSO D<sub>6</sub> DATA-2020 25

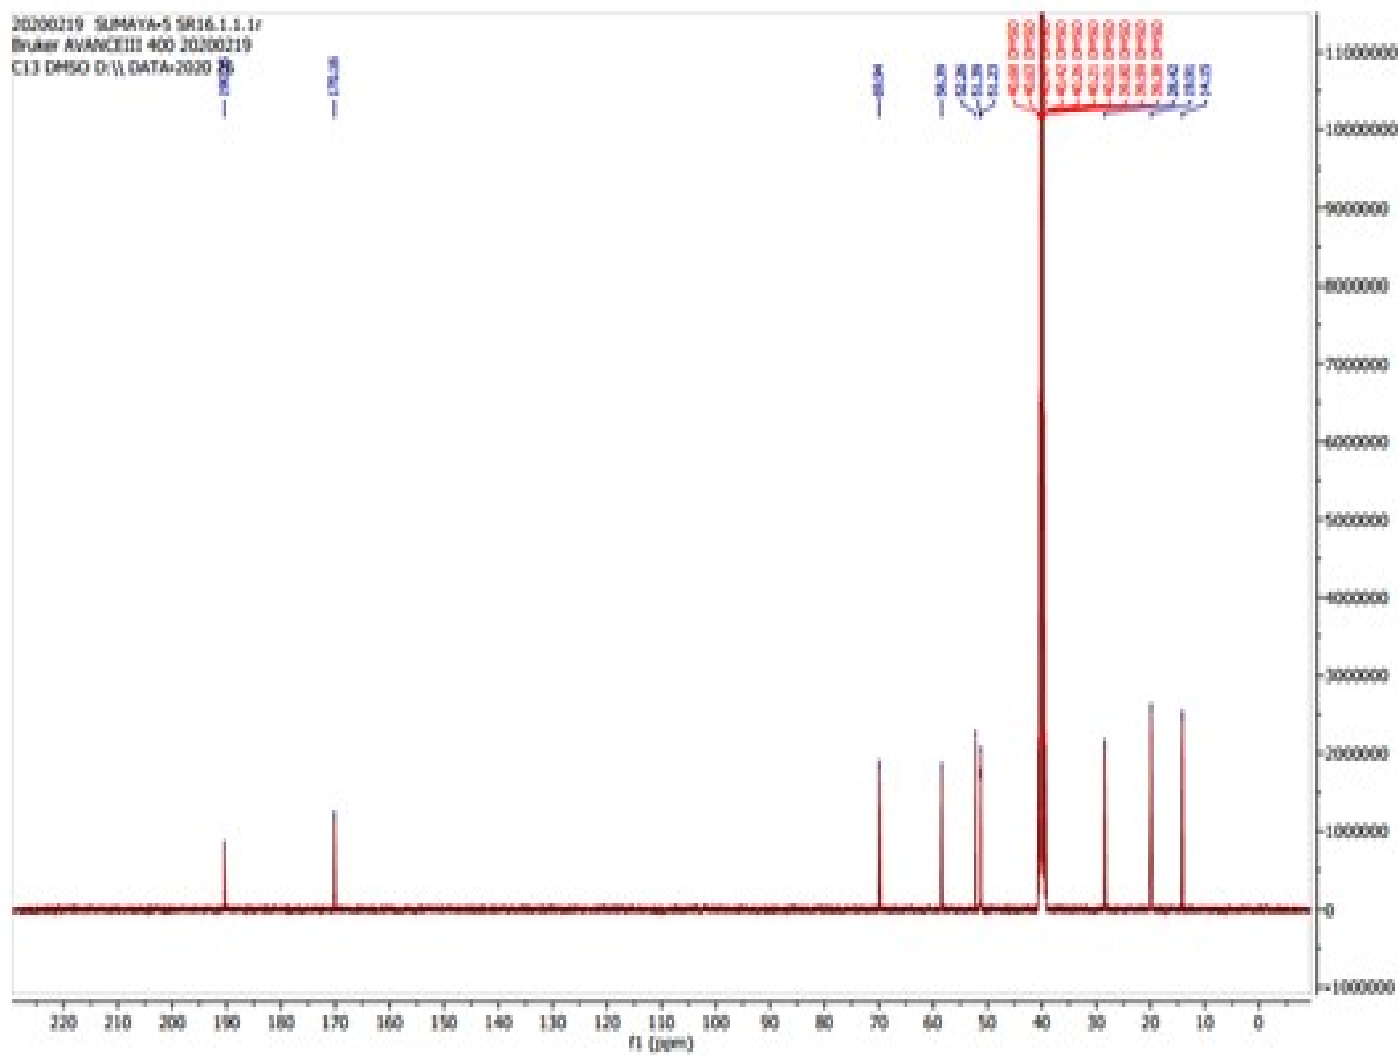

Supplement: d5ra05994a1.pdf [file d5ra05994a1.pdf]
